# Supplementary material for: Improved synthesis of DA364, an NIR fluorescence RGD probe targeting αvβ3 integrin
Source: Royal Society of Chemistry journal article supplement (doi:10.1039/d3ob01206a), 2023-01-01

## Electronic Supporting Information

### Improved synthesis of DA364, a NIR fluorescence

### RGD probe targeting $\alpha_v\beta_3$ integrin

Rachele Maschio,<sup>a</sup> Federica Buonsanti,<sup>b</sup> Federico Crivellin,<sup>b</sup> Fulvio Ferretti,<sup>b</sup> Luciano Lattuada,<sup>\*b</sup> Federico Maisano,<sup>b</sup> Laura Orio,<sup>b</sup> Lorena Pizzuto,<sup>b</sup> Raphael Campanella,<sup>c</sup> Anthony Clouet,<sup>c</sup> Camilla Cavallotti<sup>d</sup> and Giovanni B. Giovenzana.<sup>\*a,d</sup>

<sup>a</sup> *Dipartimento di Scienze del Farmaco, Università del Piemonte Orientale, Largo Donegani 2/3, 28100 Novara, Italy. E-mail: [giovannibattista.giovenzana@uniupo.it](mailto:giovannibattista.giovenzana@uniupo.it)*

<sup>b</sup> *Bracco Imaging Spa, Bracco Research Centre, Via Ribes 5, 10010 Colletterto Giacosa (TO), Italy. E-mail: [luciano.lattuada@bracco.com](mailto:luciano.lattuada@bracco.com)*

<sup>c</sup> *Bracco Suisse SA, Route de la Galaise 31, 1228 Plan le Ouates, Switzerland.*

<sup>d</sup> *CAGE Chemicals Srl, Via Bovio 6, 28100 Novara, Italy*

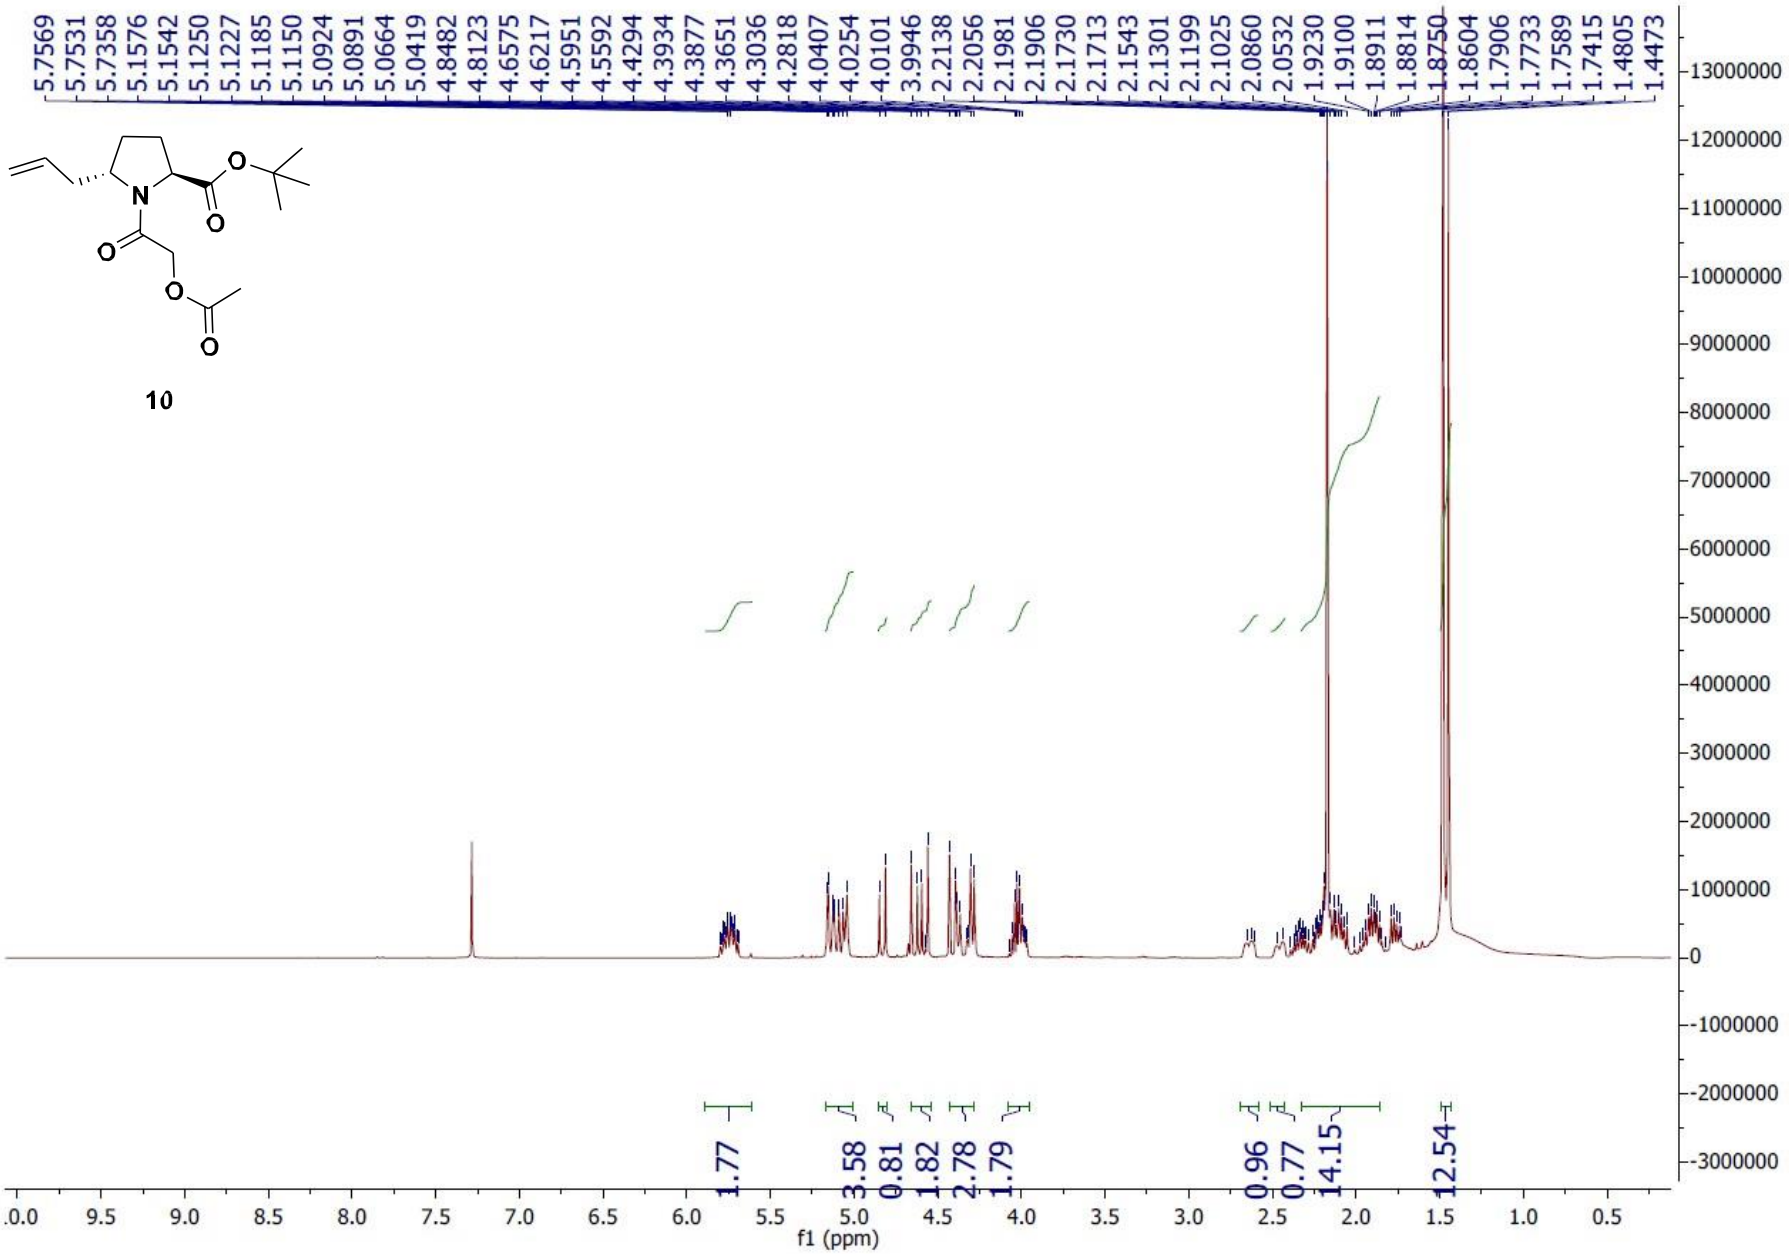

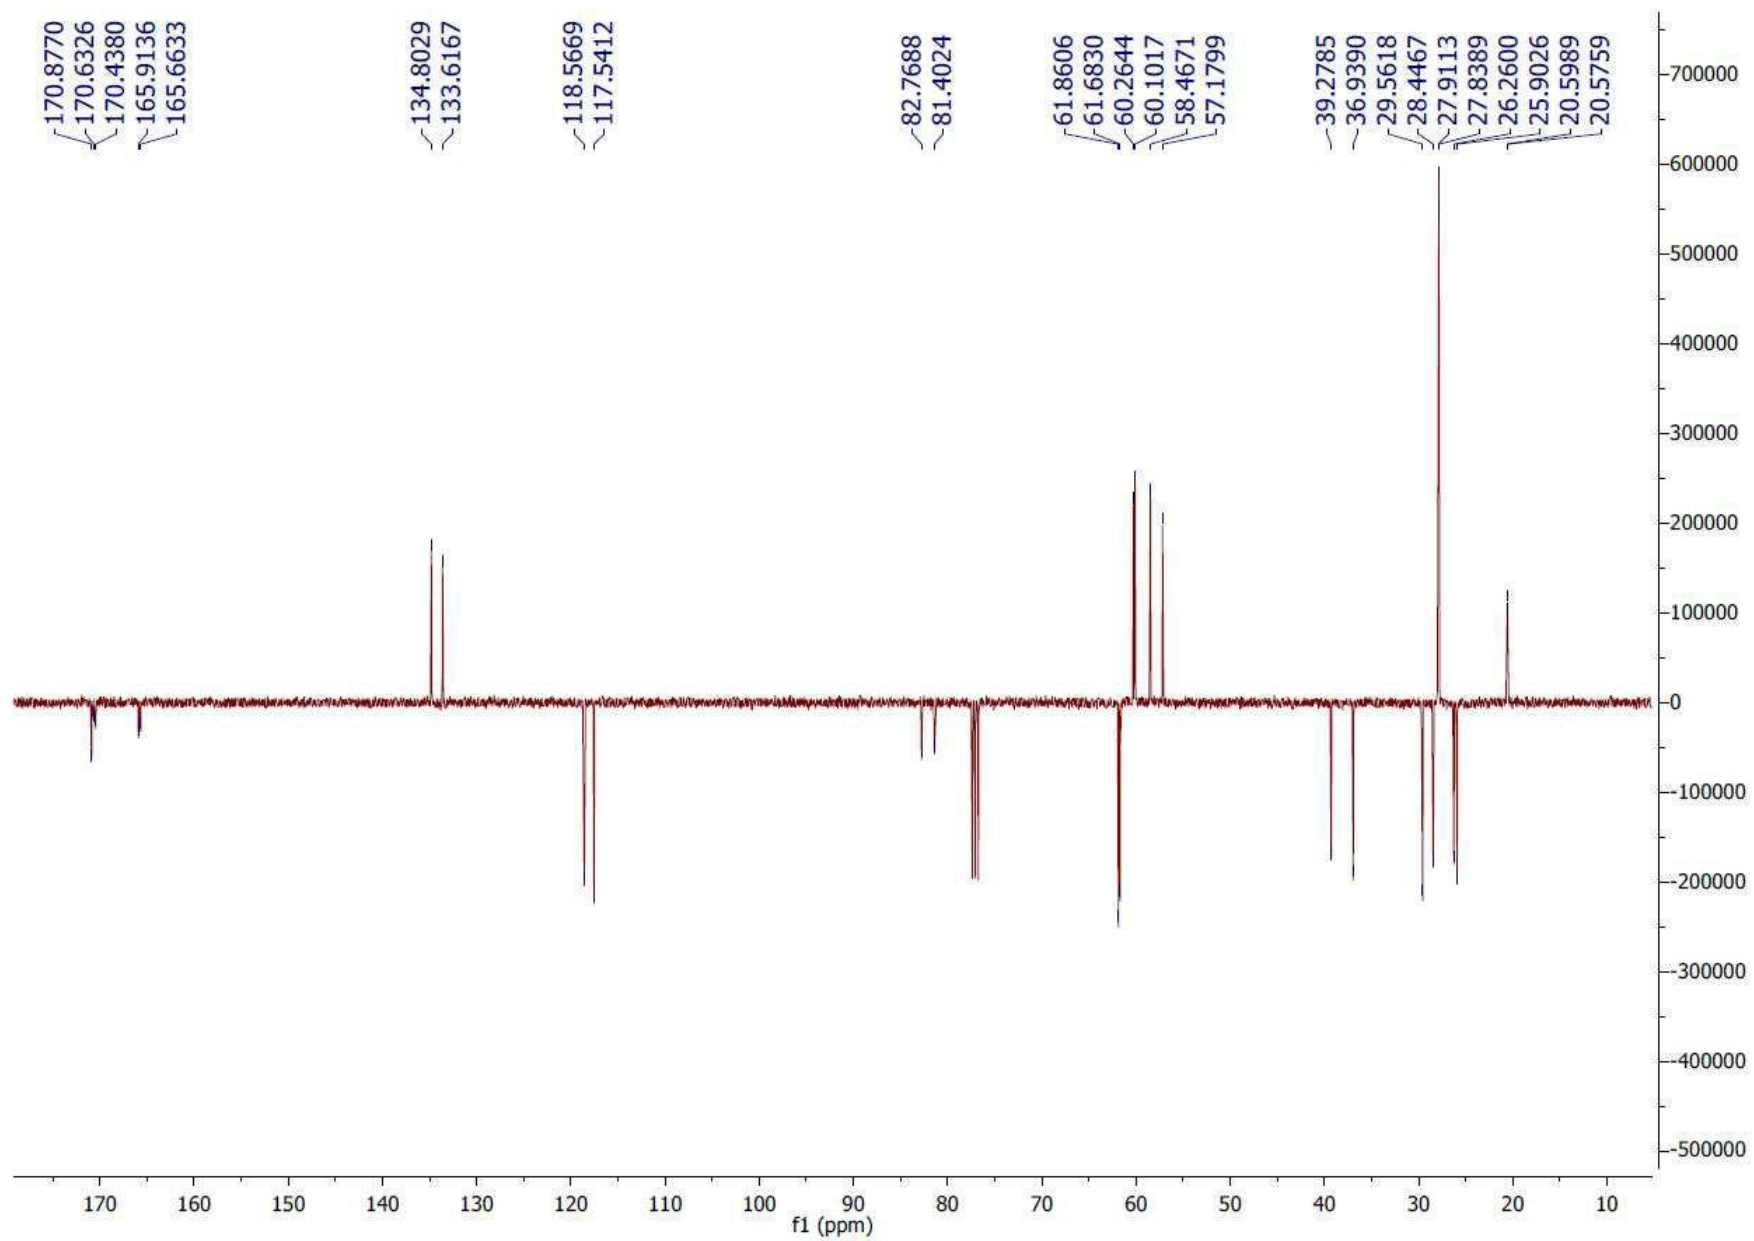

T: FTMS + p ESI Full ms [100.0000-1500.0000]

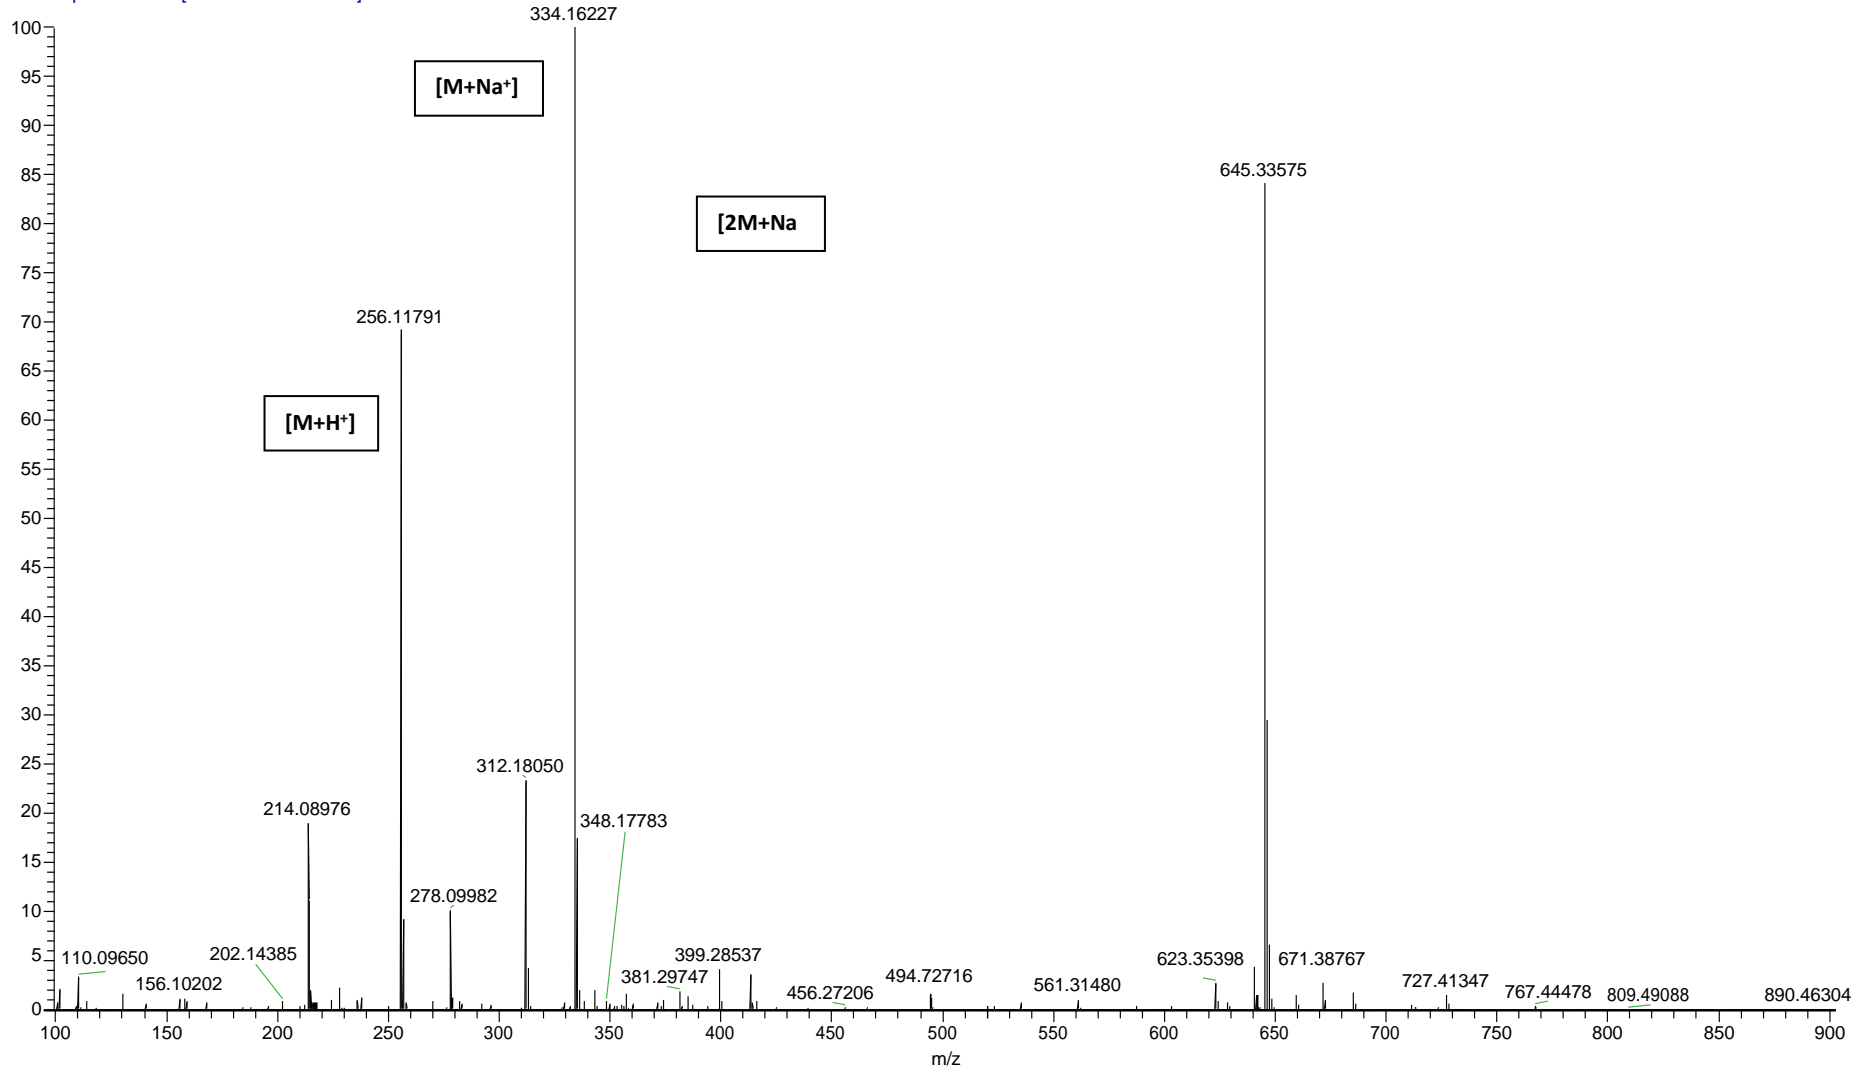

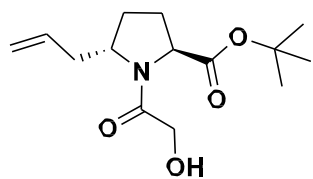

11

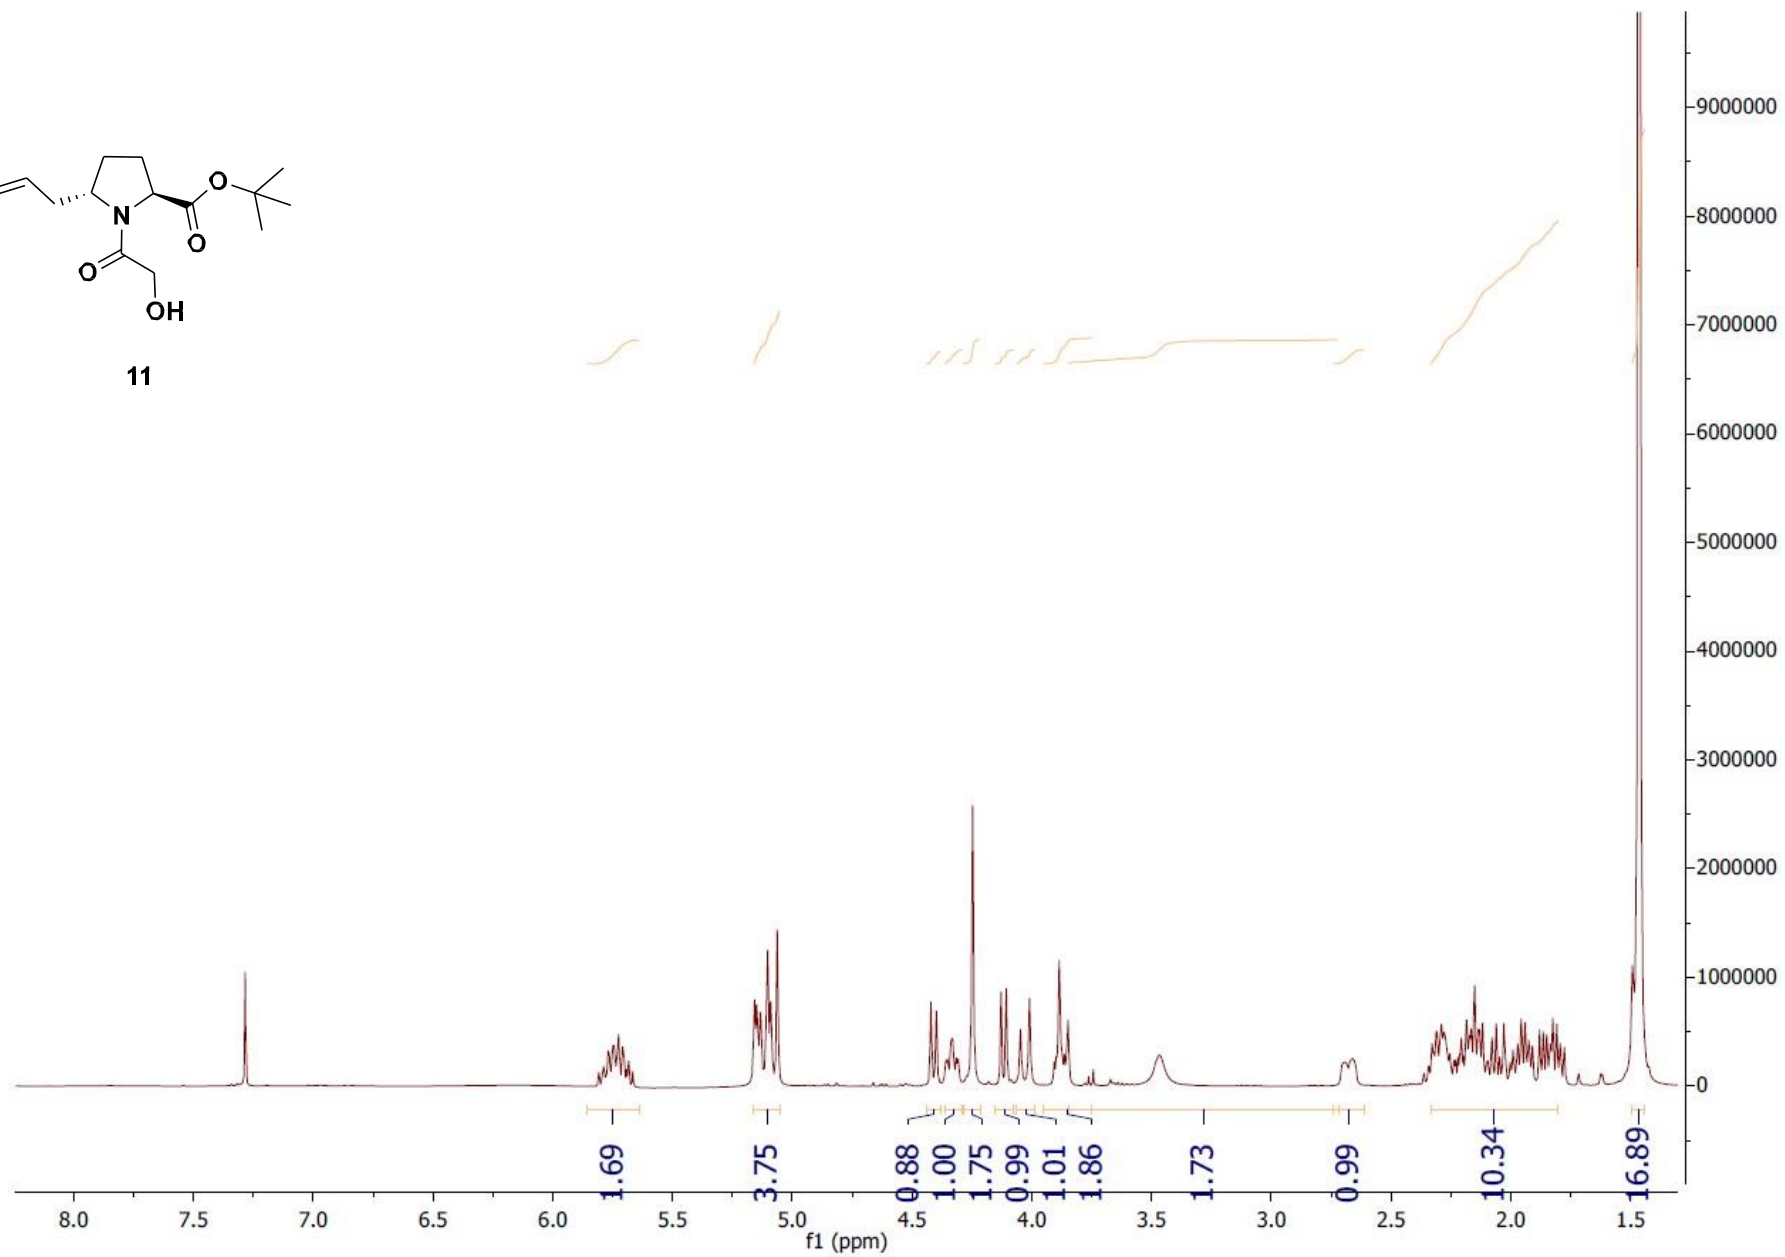

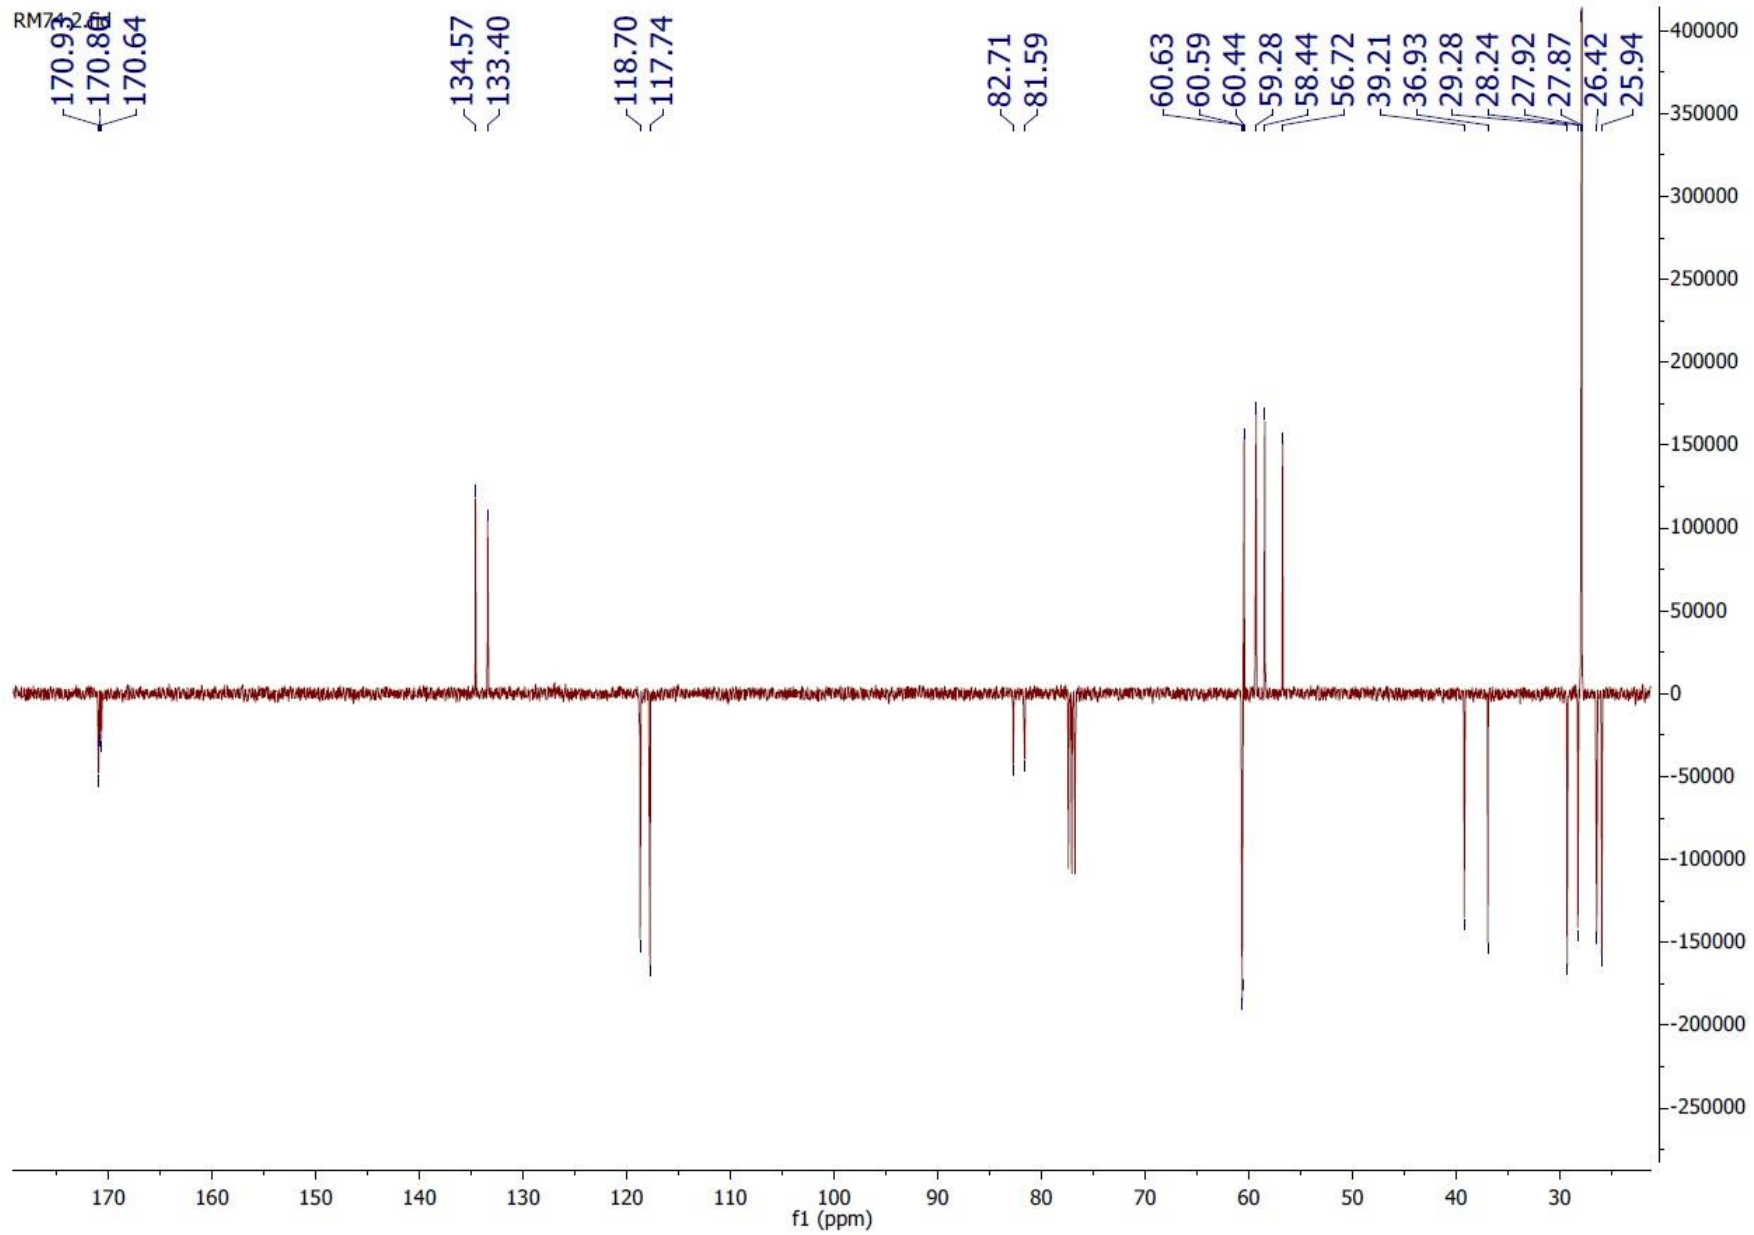

T: FTMS + p ESI Full ms [100.0000-1500.0000]

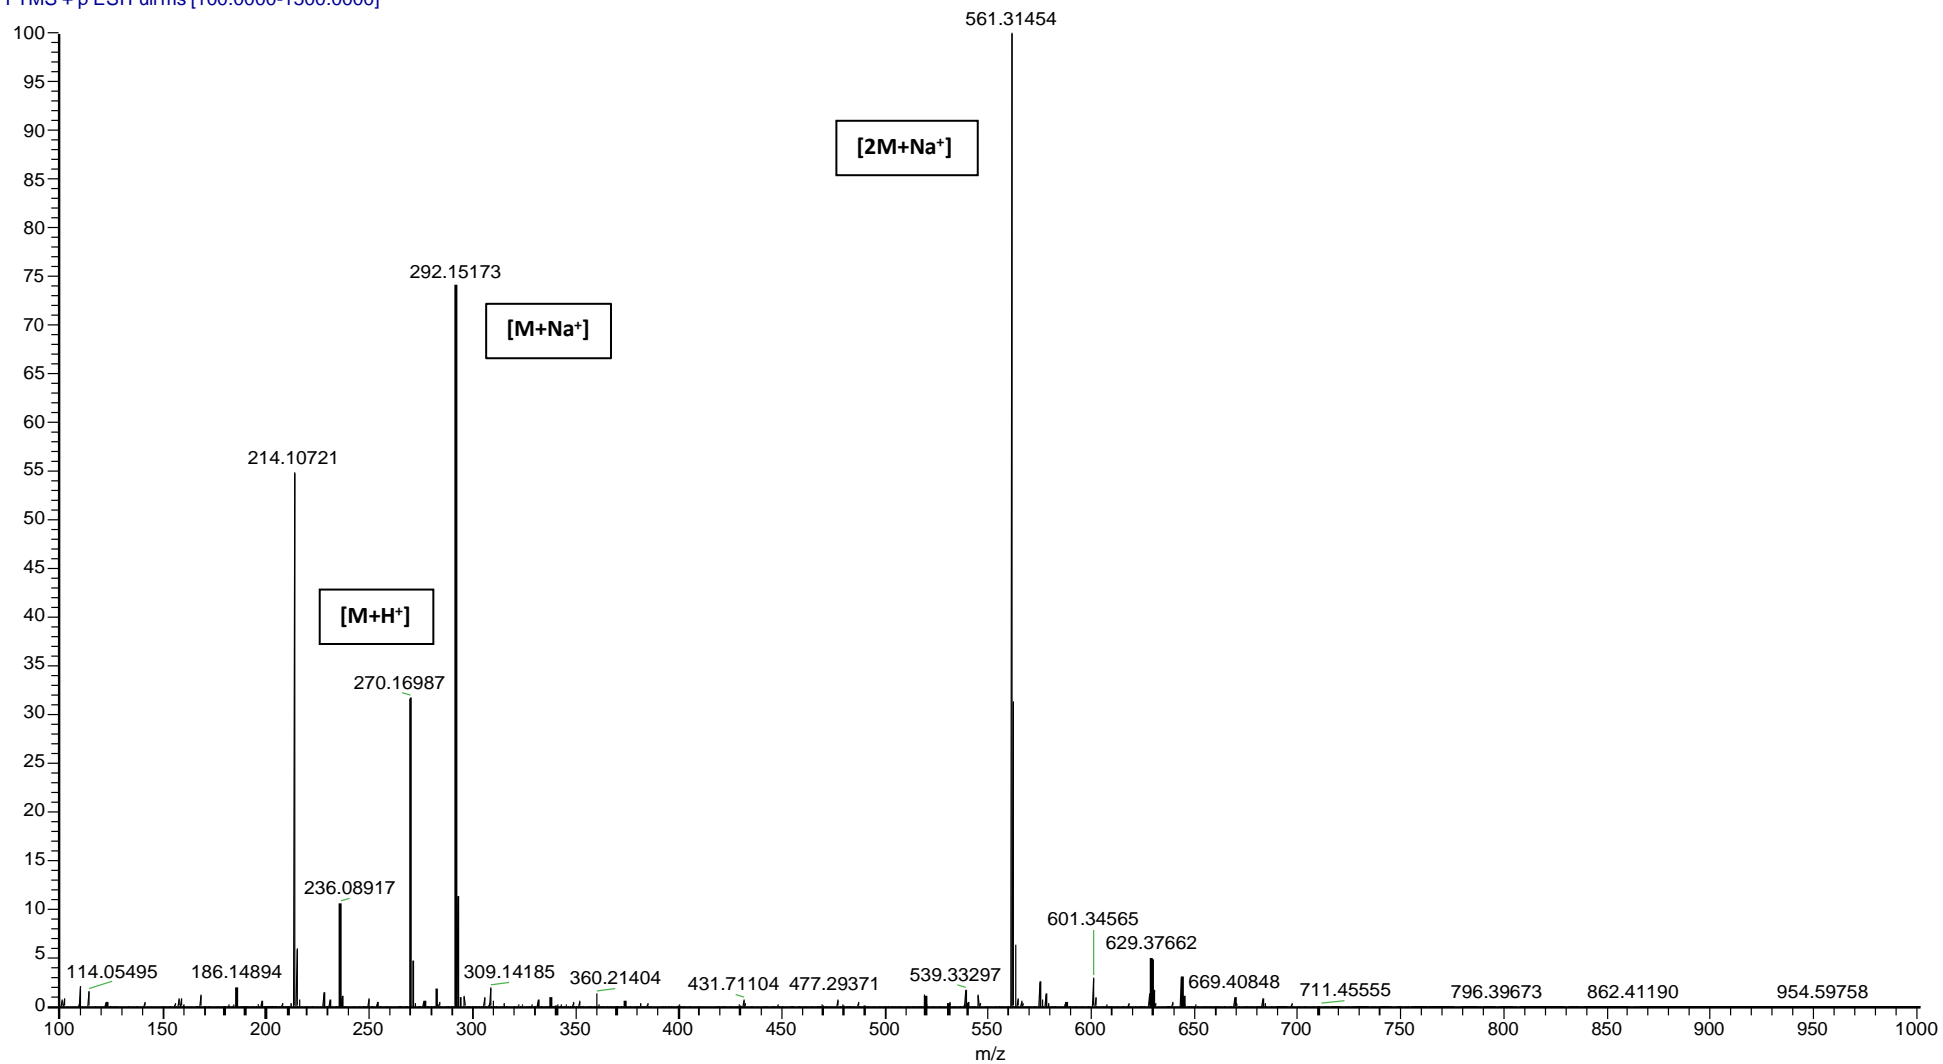

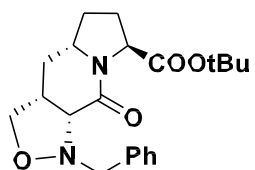

1

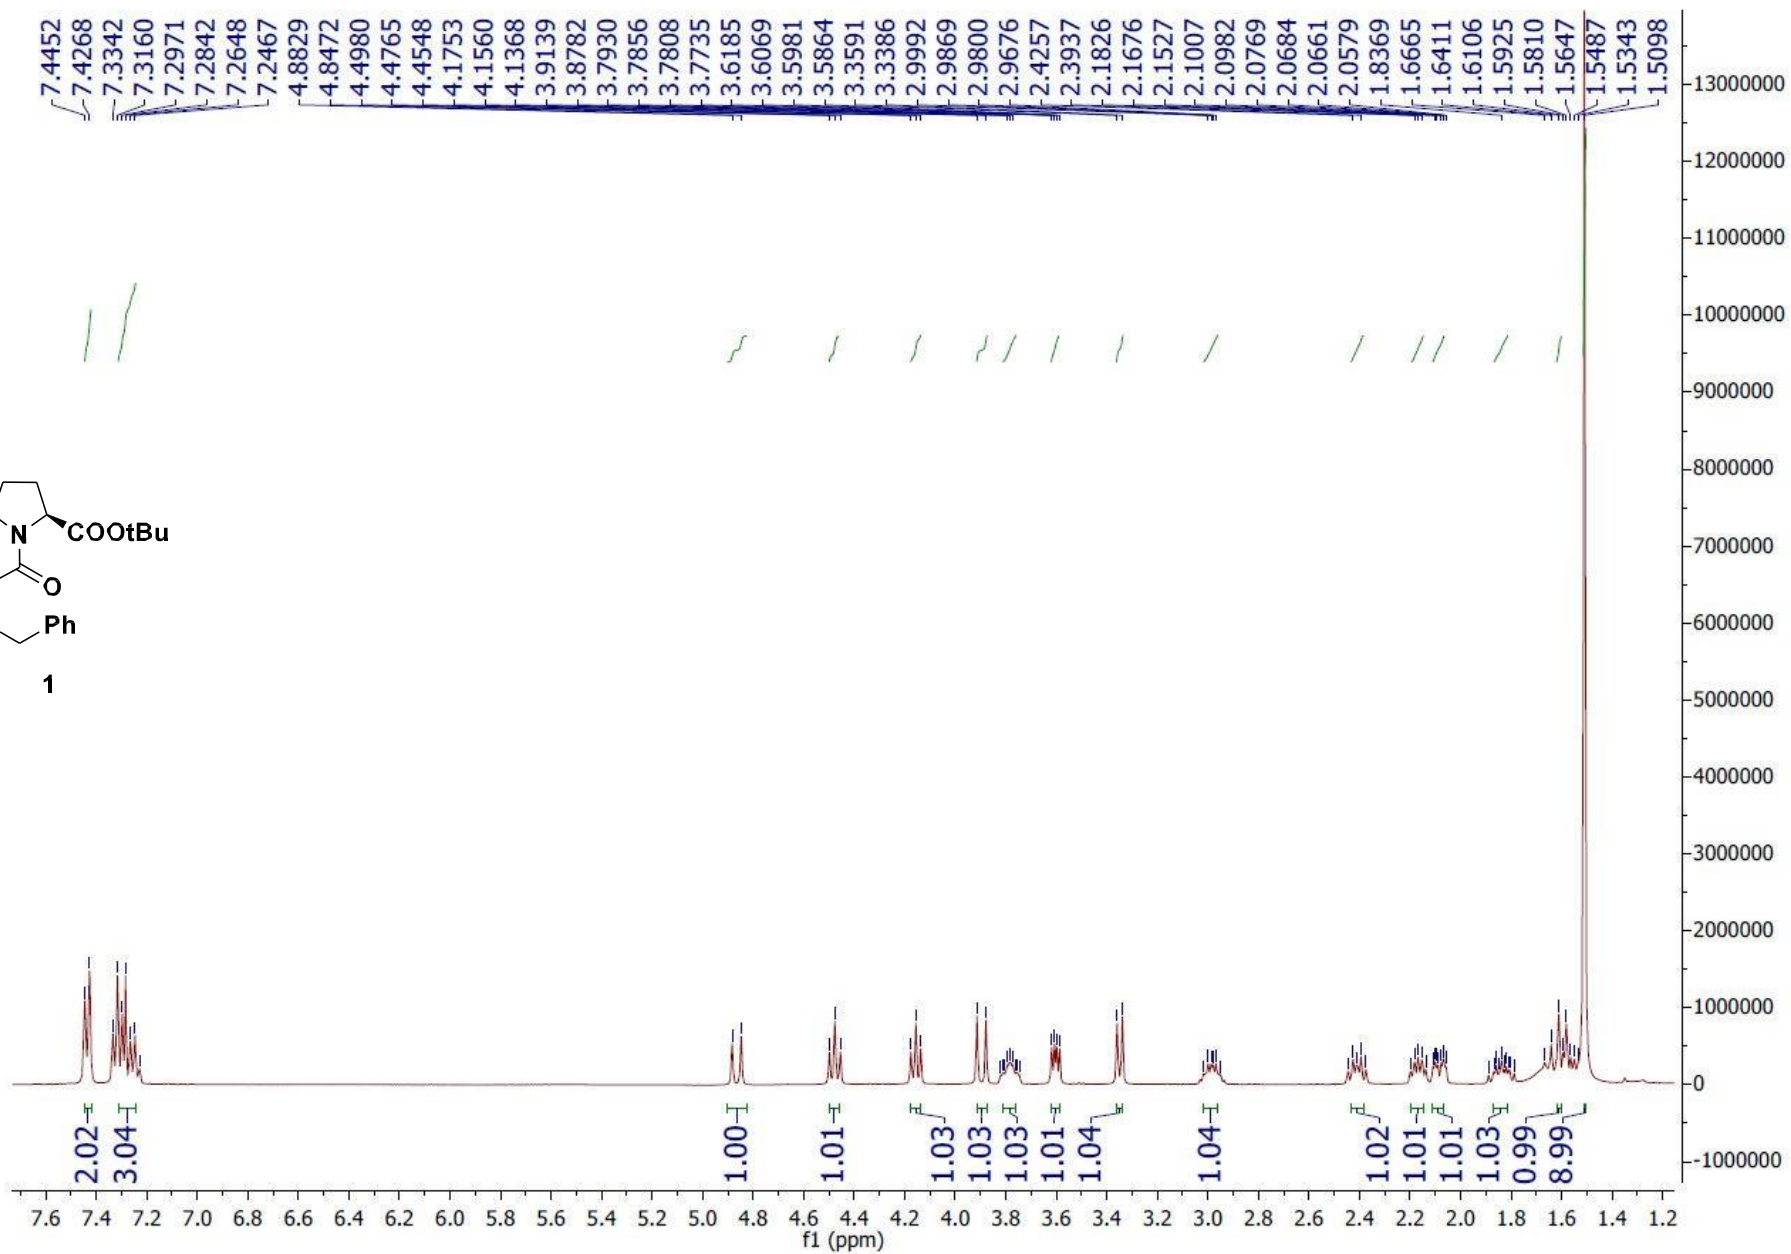



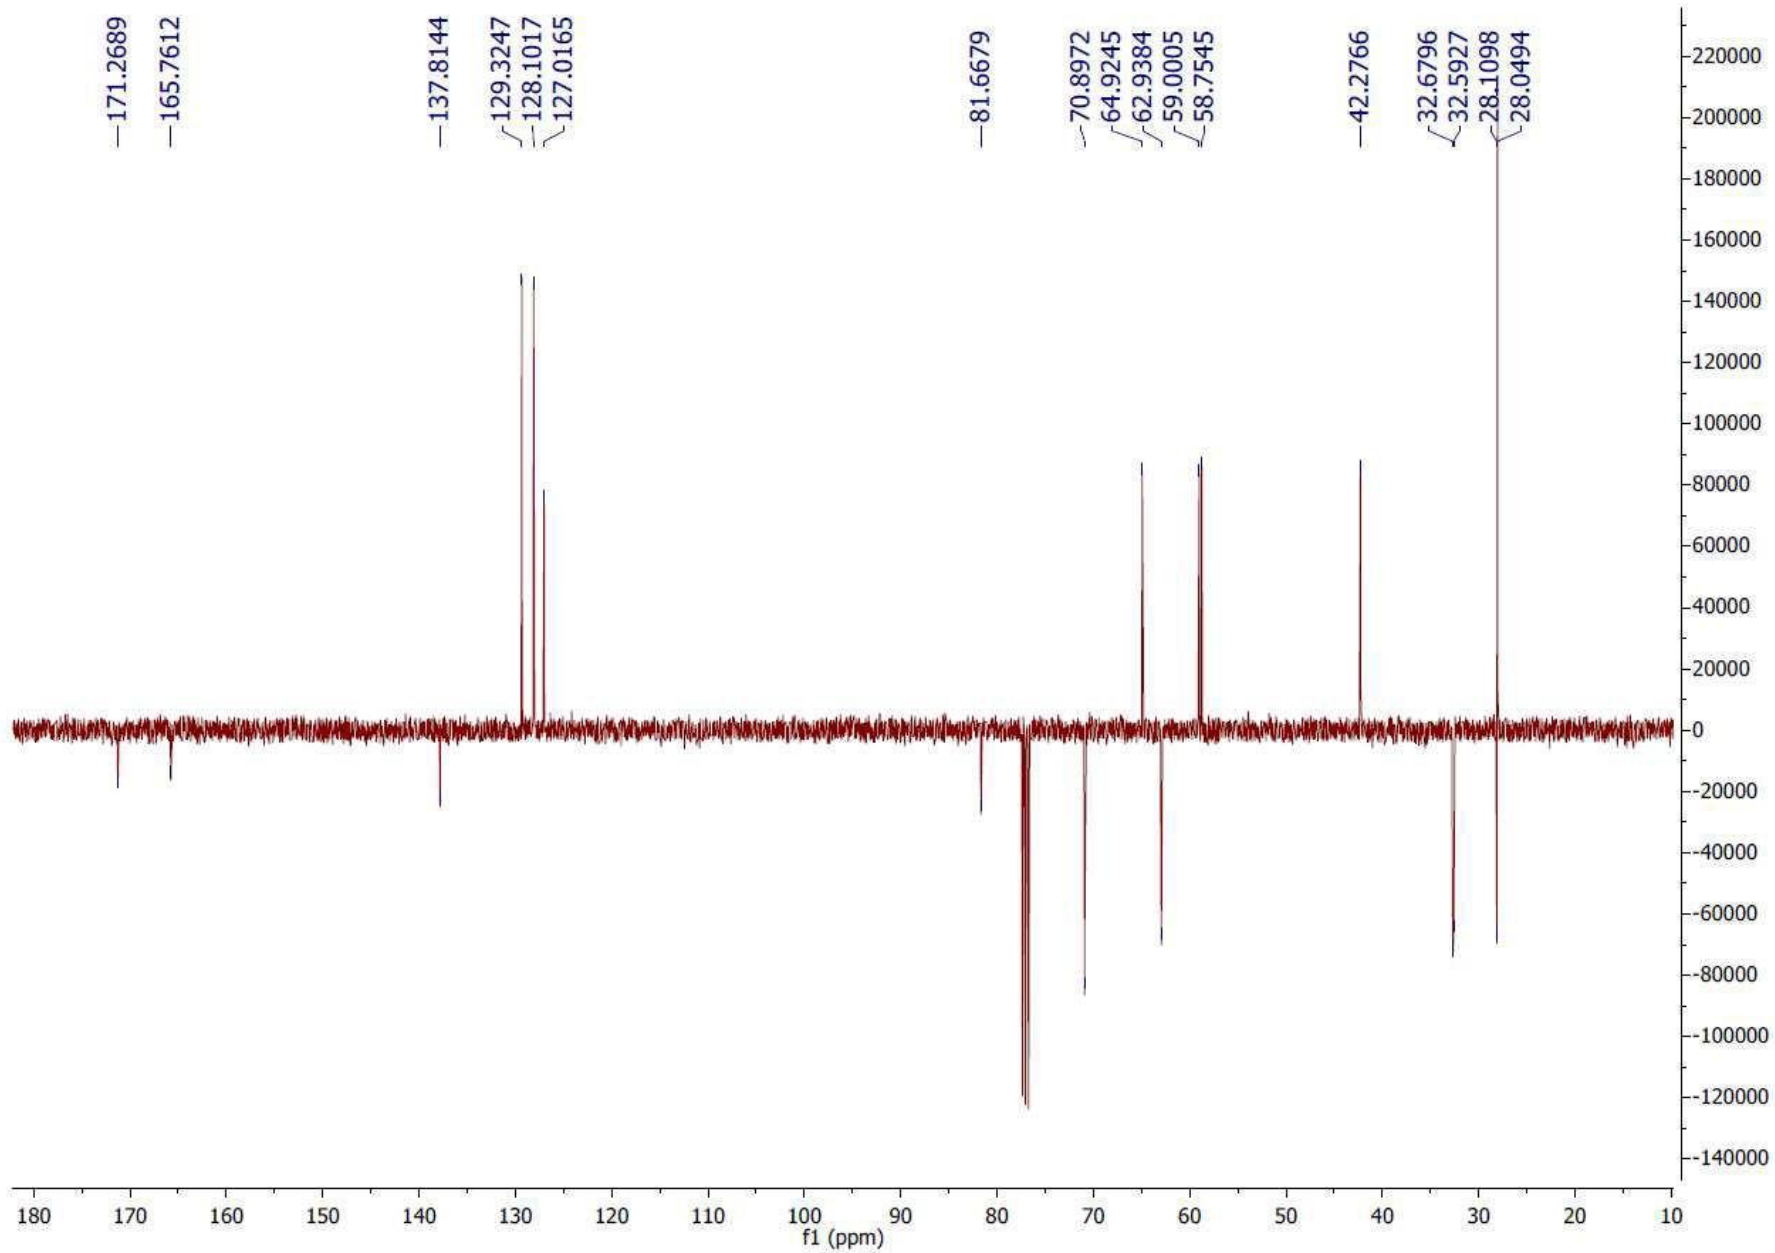

T: FTMS + p ESI Full ms [100.0000-1500.0000]

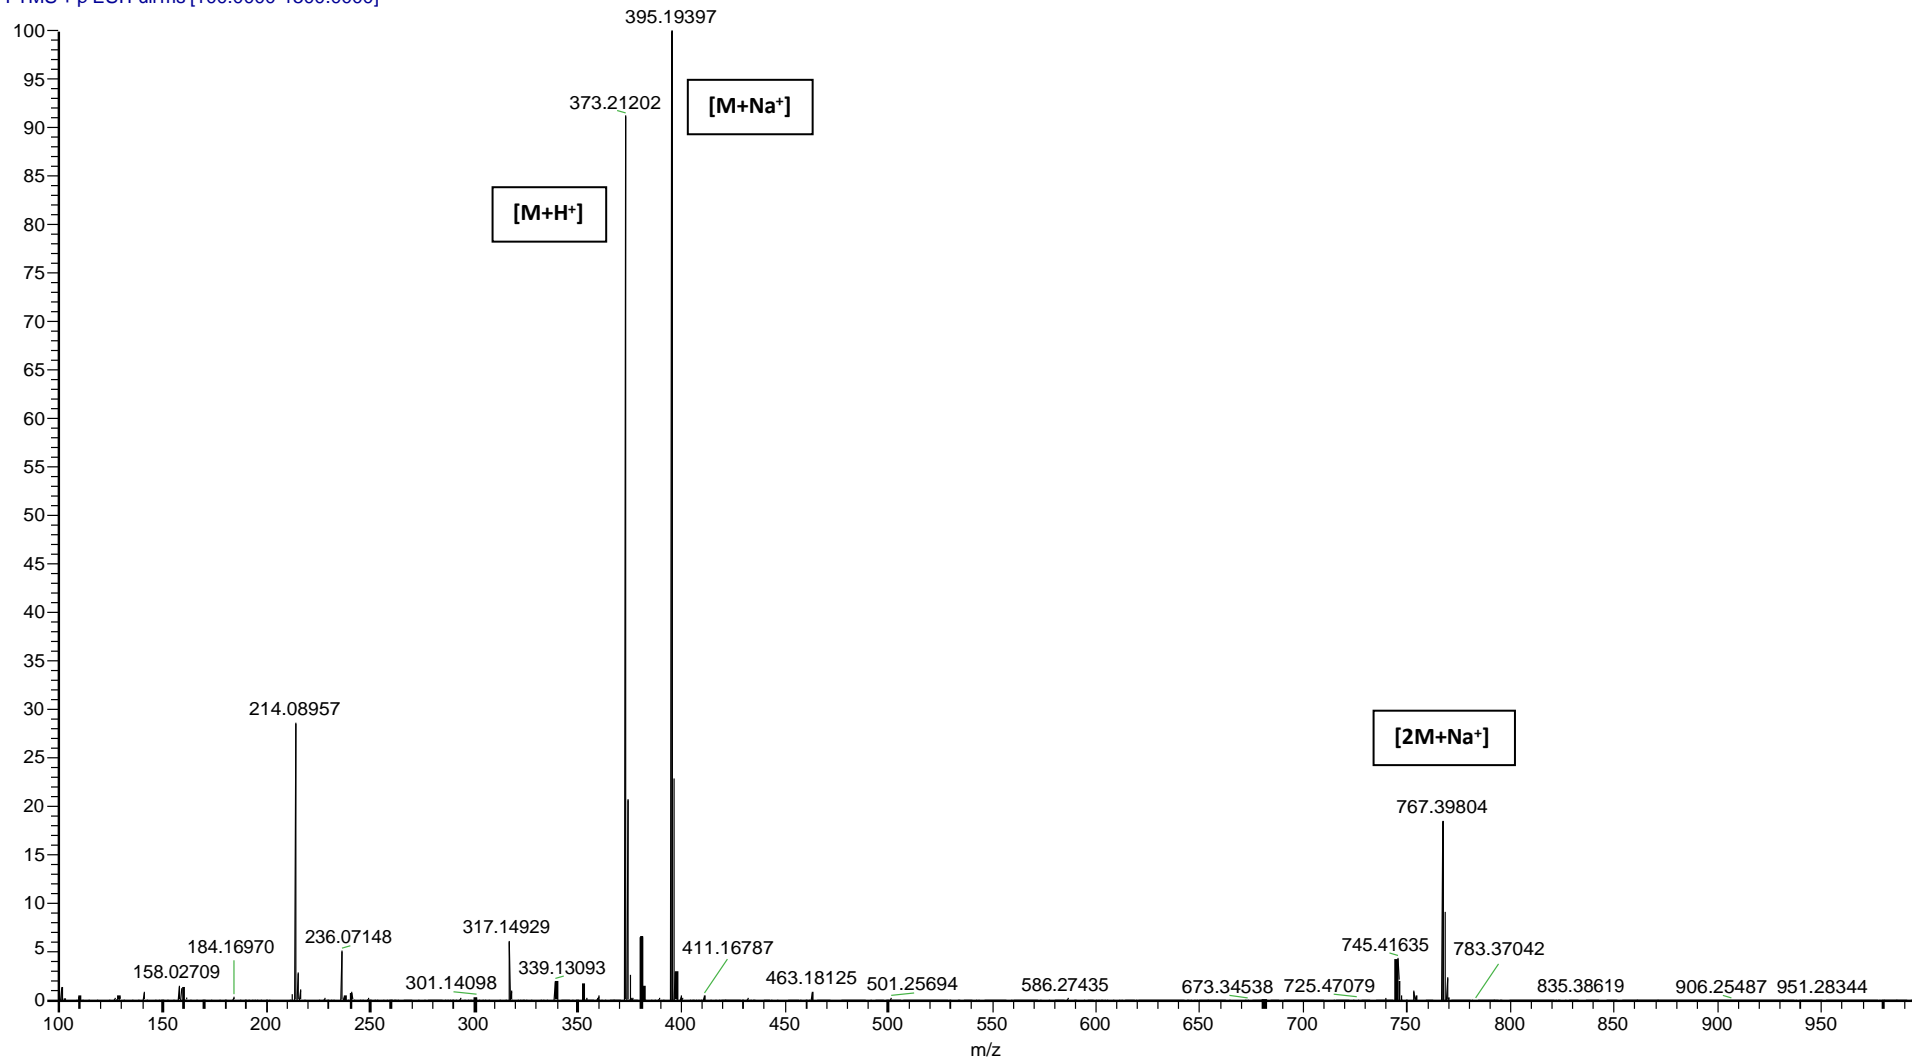

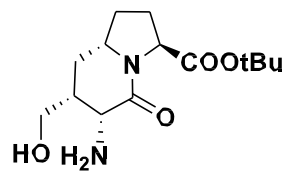

13

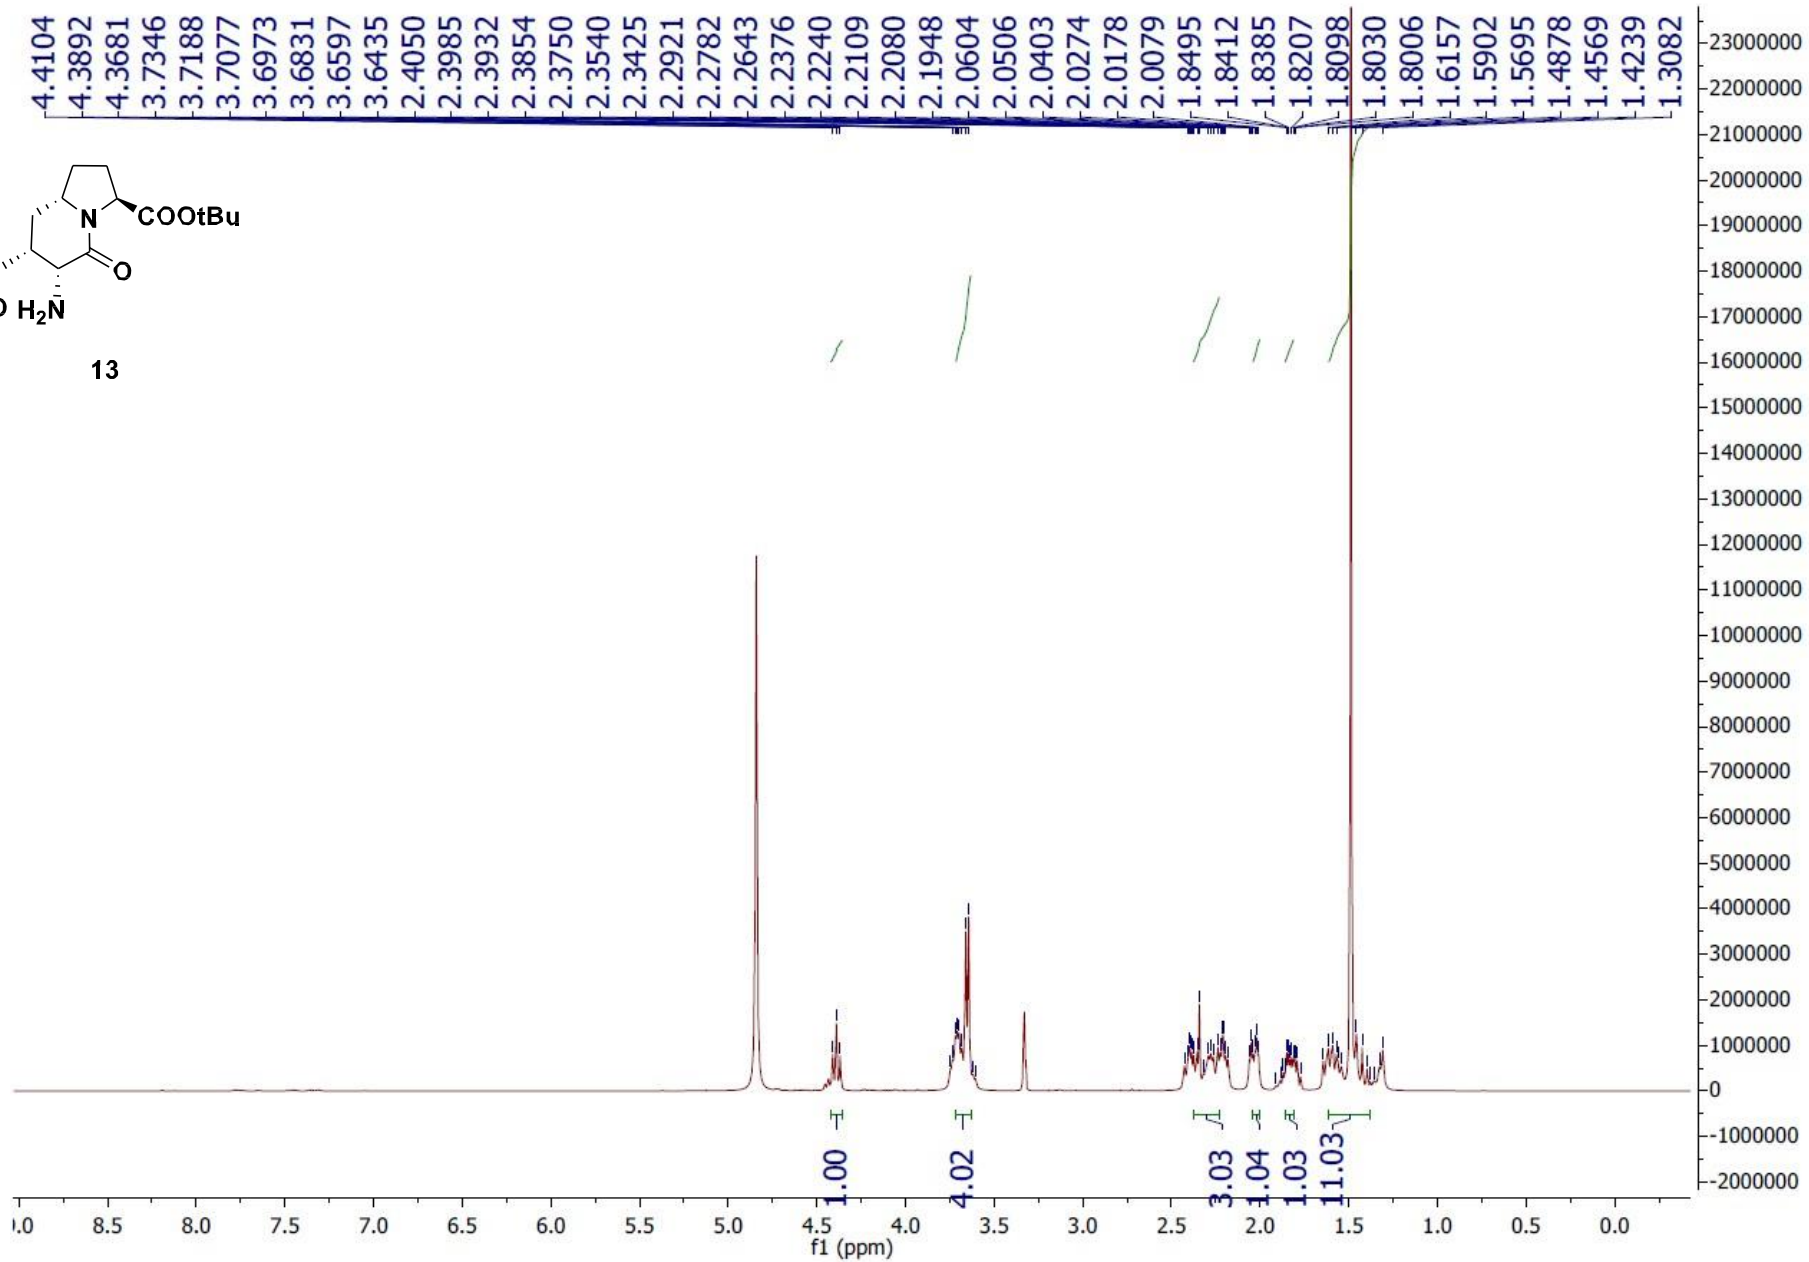

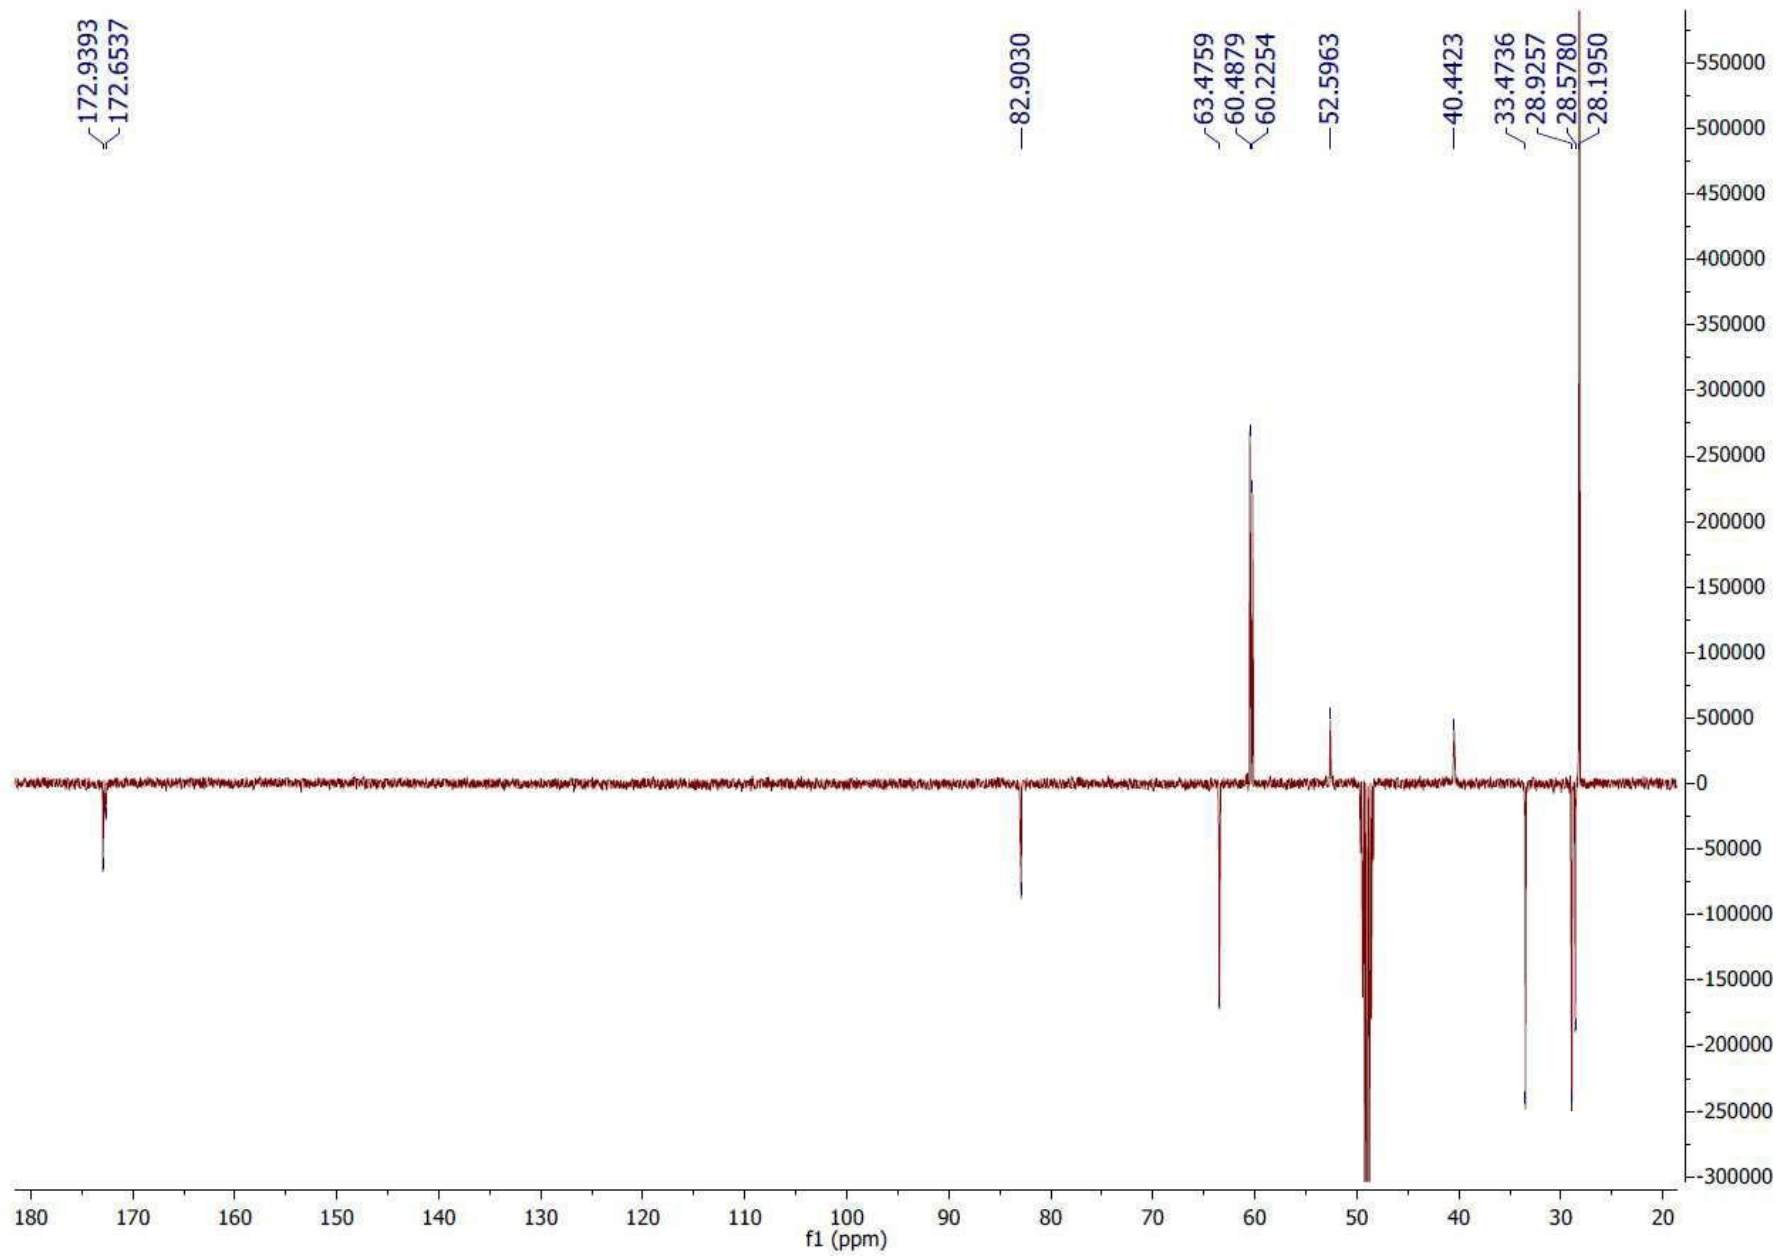

T: FTMS+pESIFullms[100.0000-1500.0000]

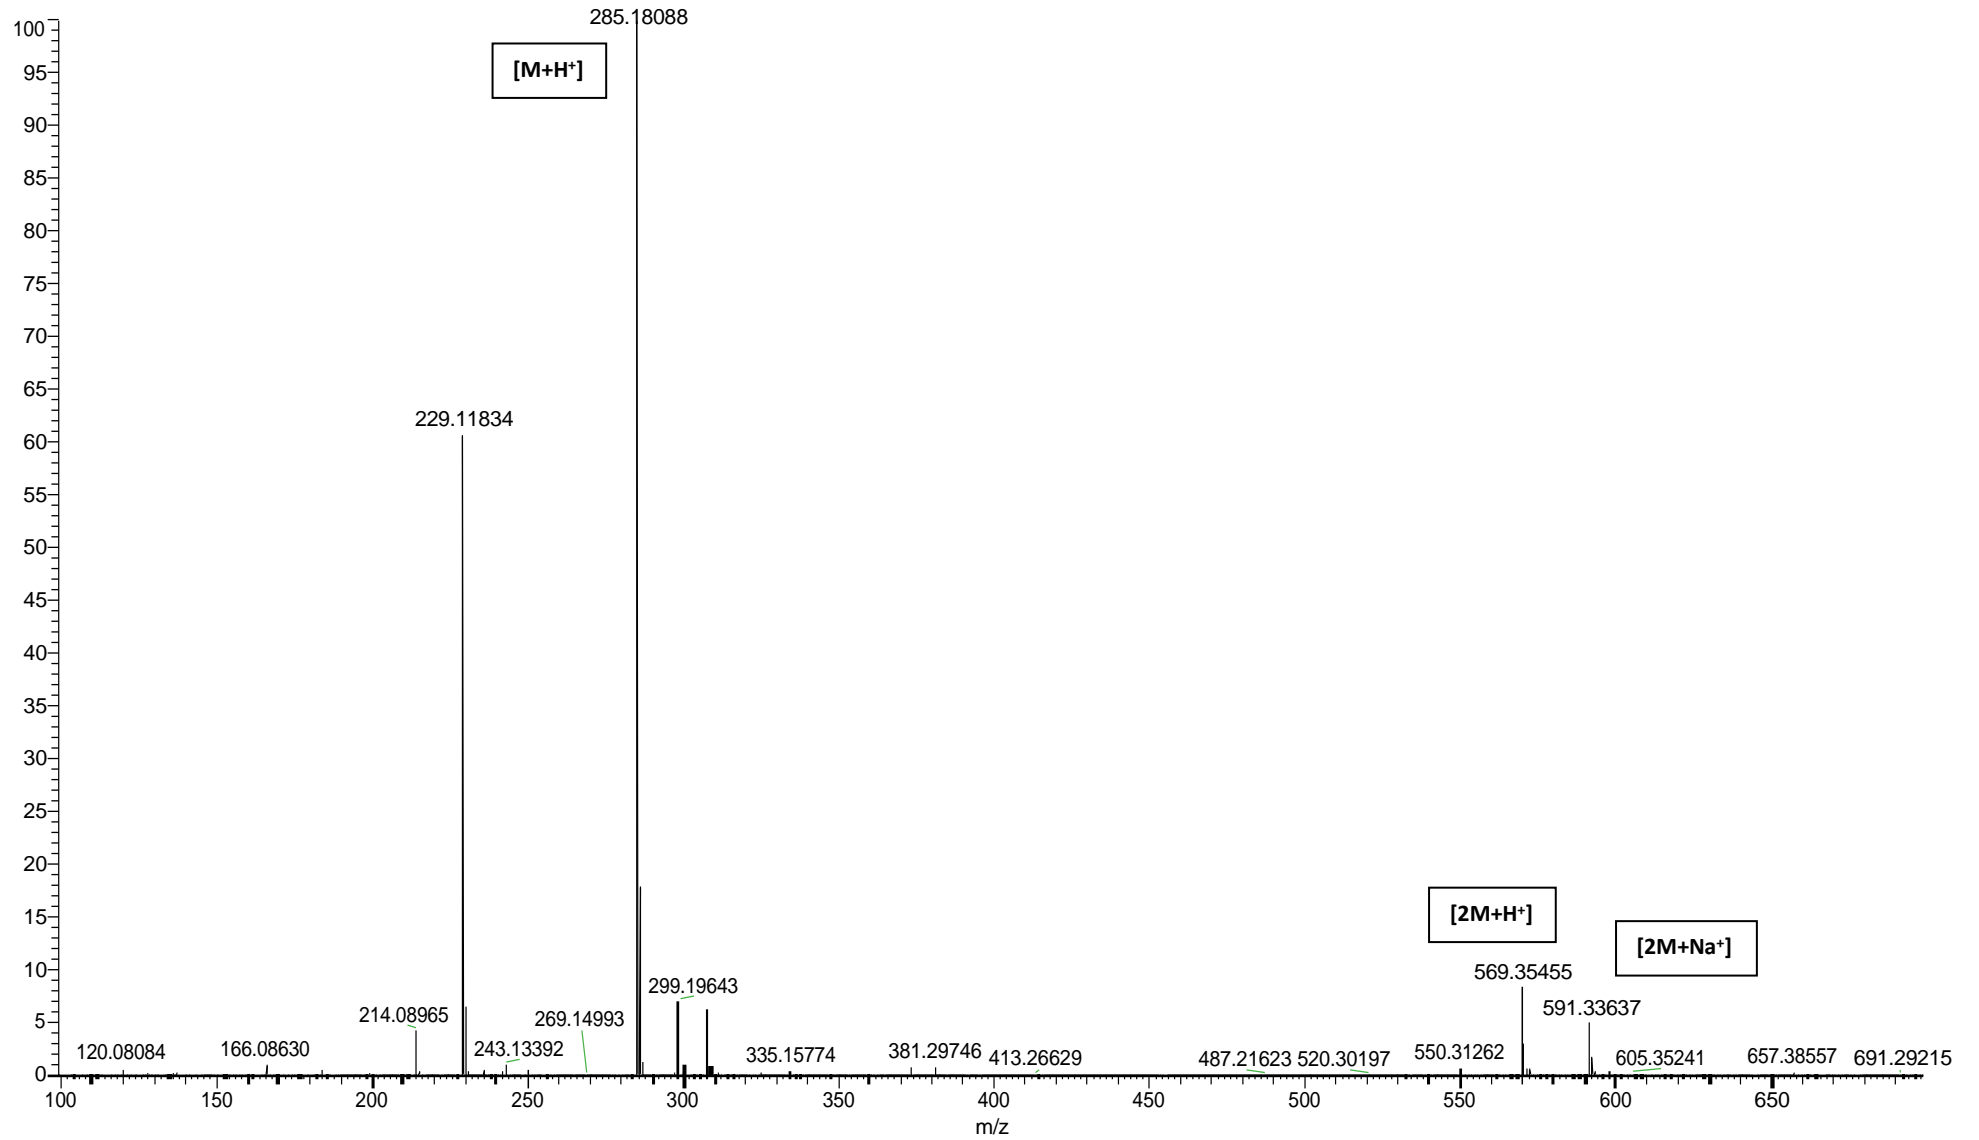

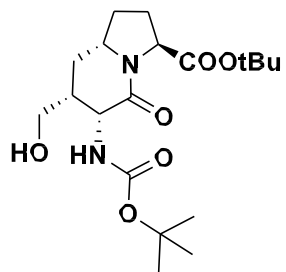

14

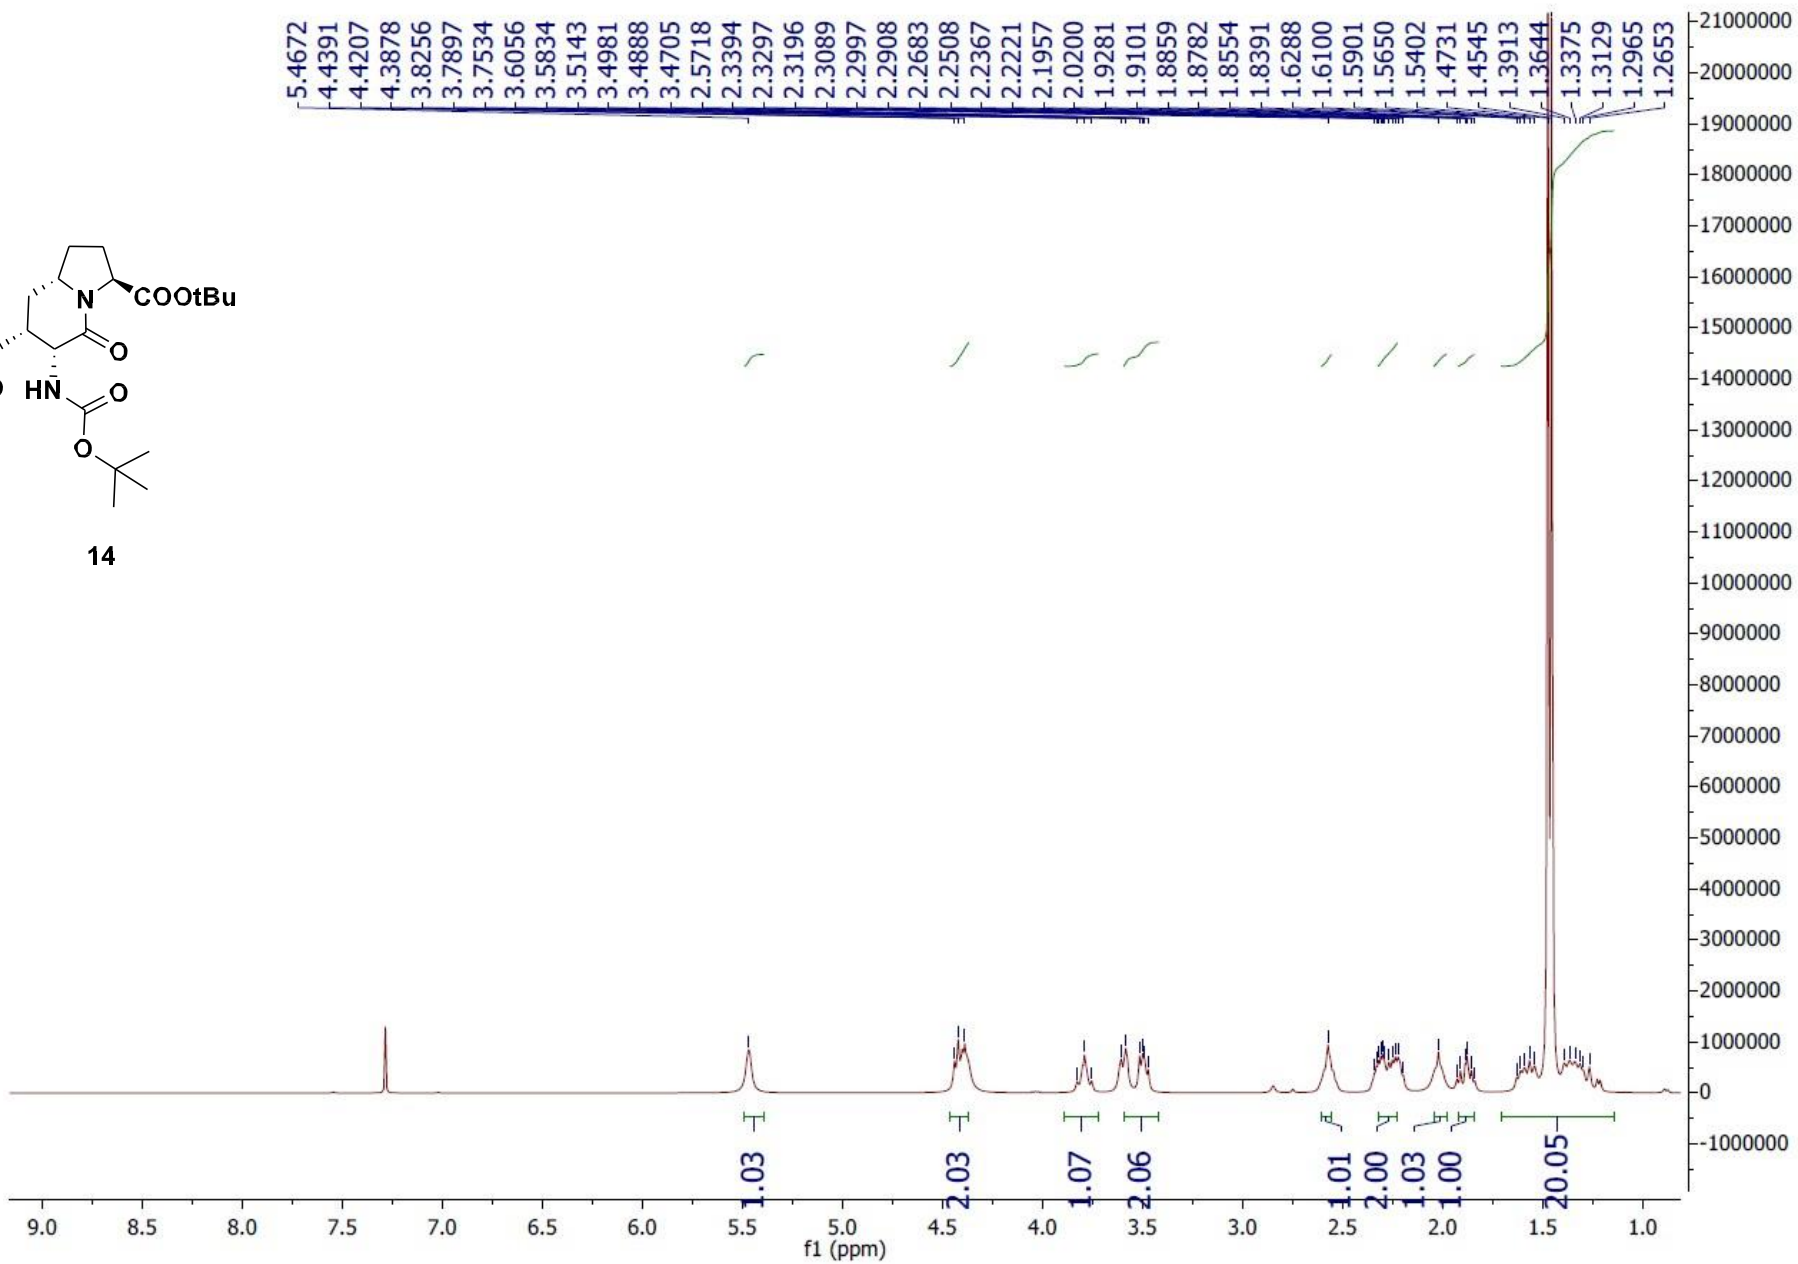

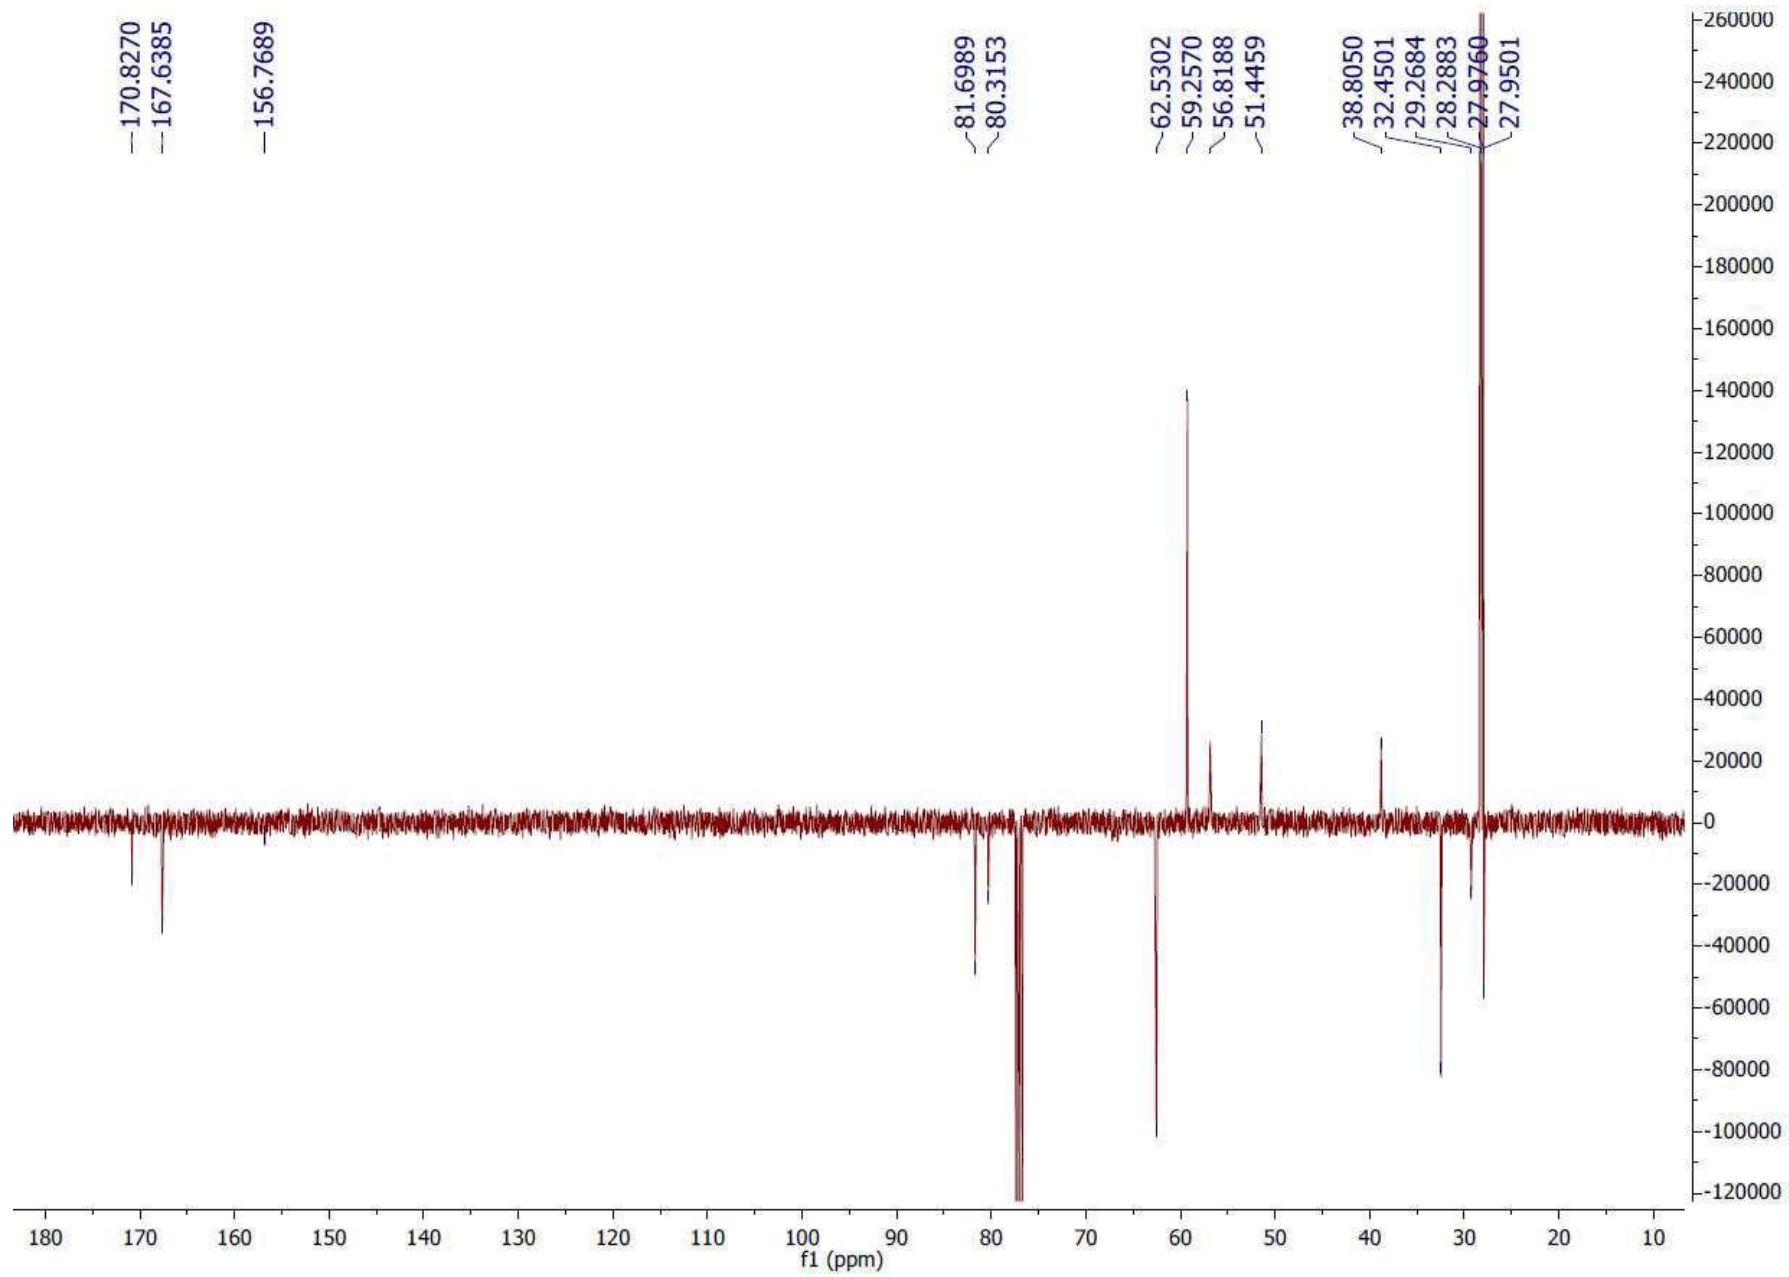

T: FTMS + p ESI Full ms [100.0000-1500.0000]

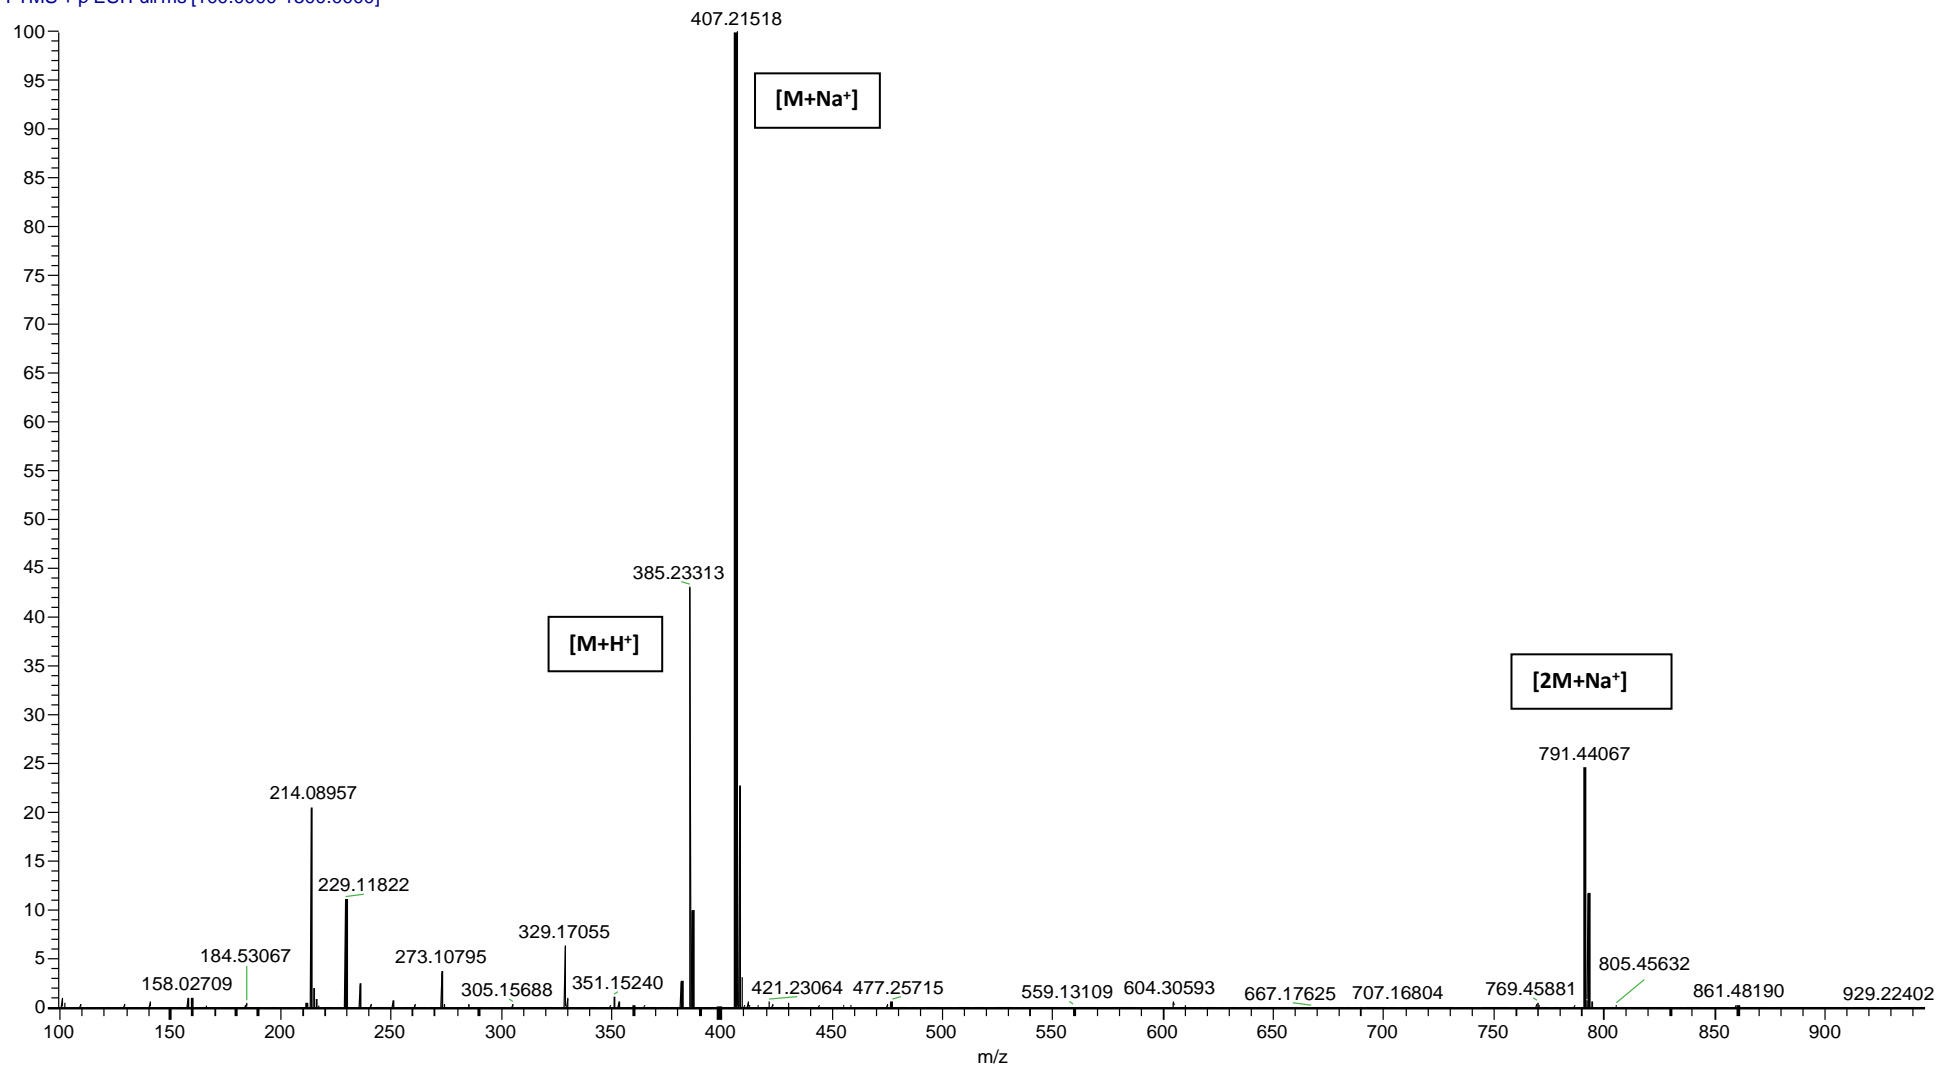



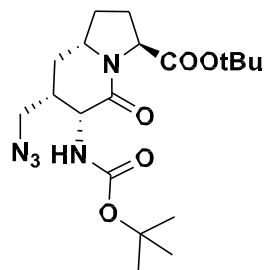

15

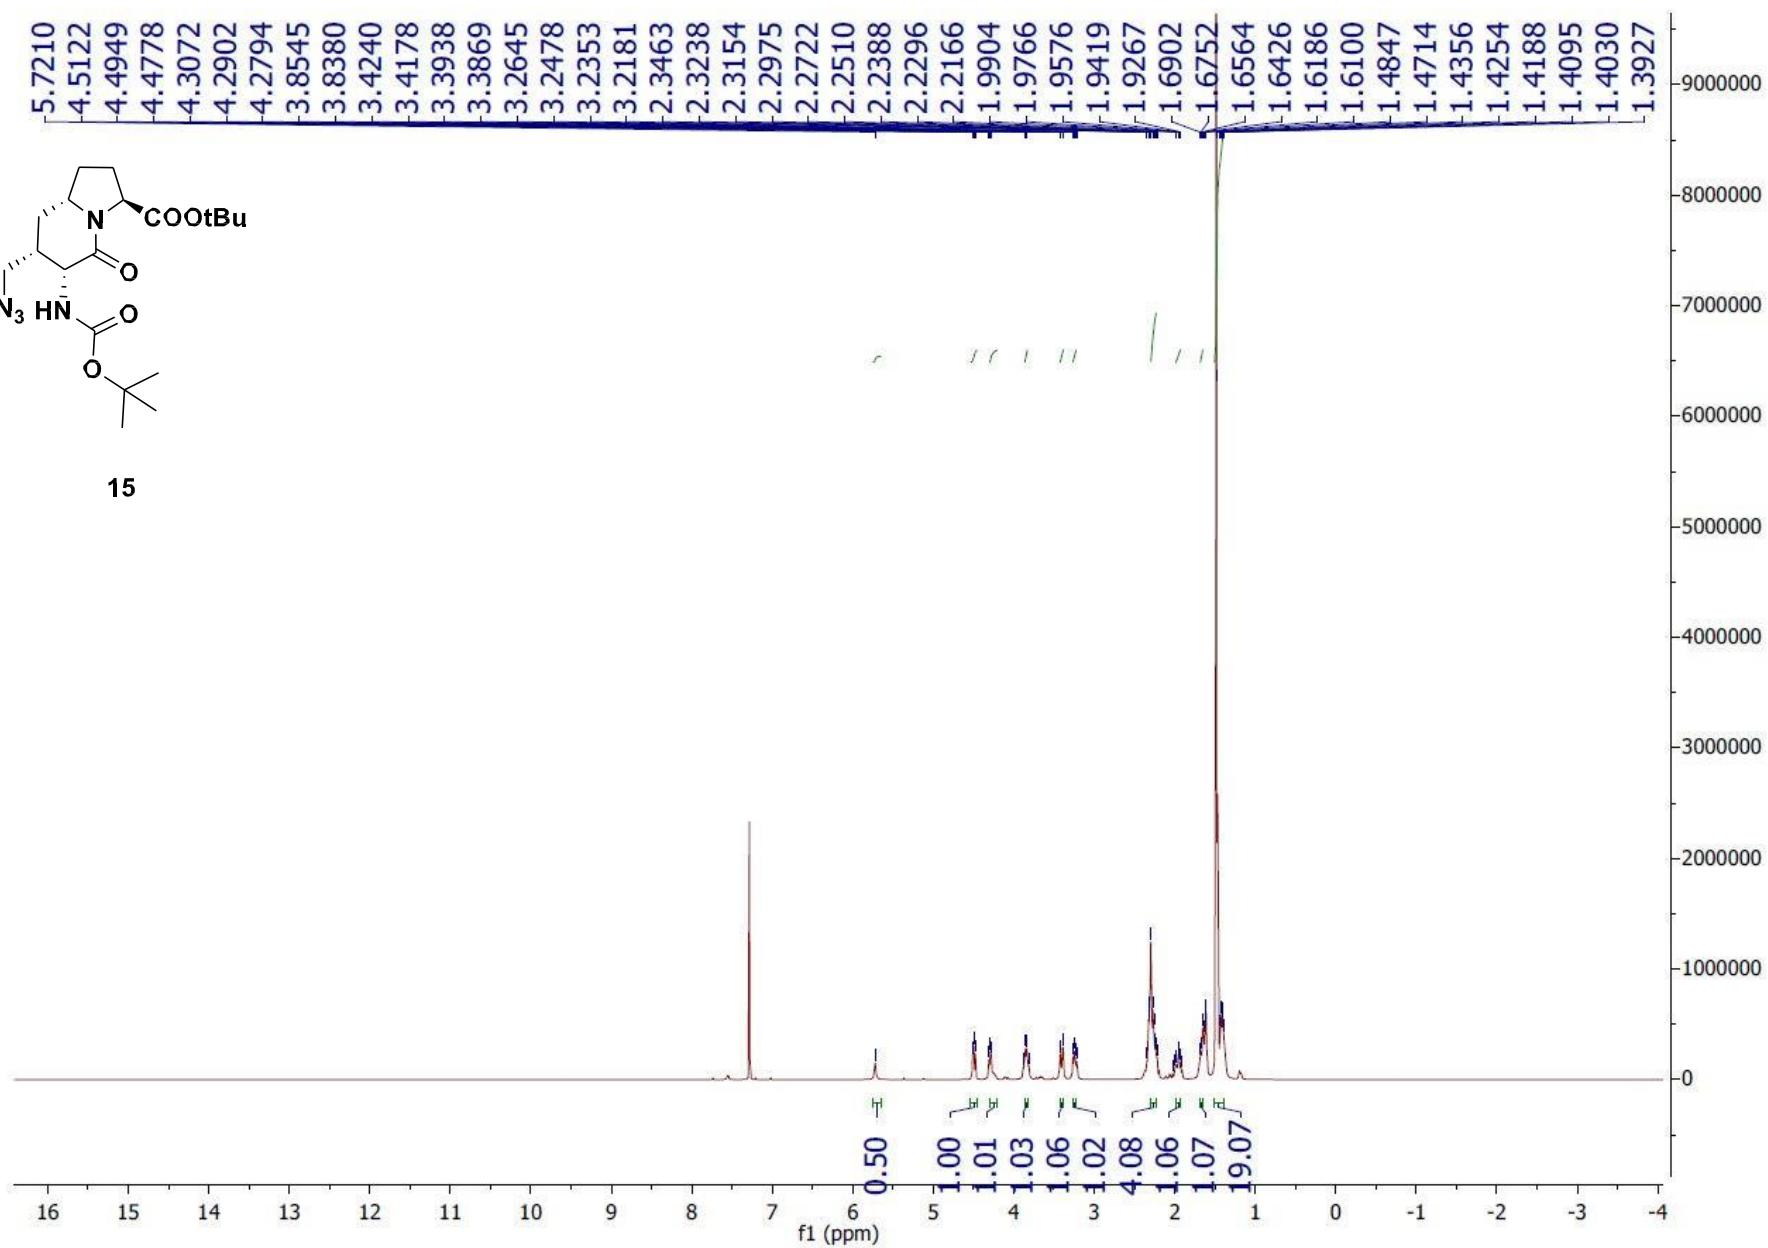

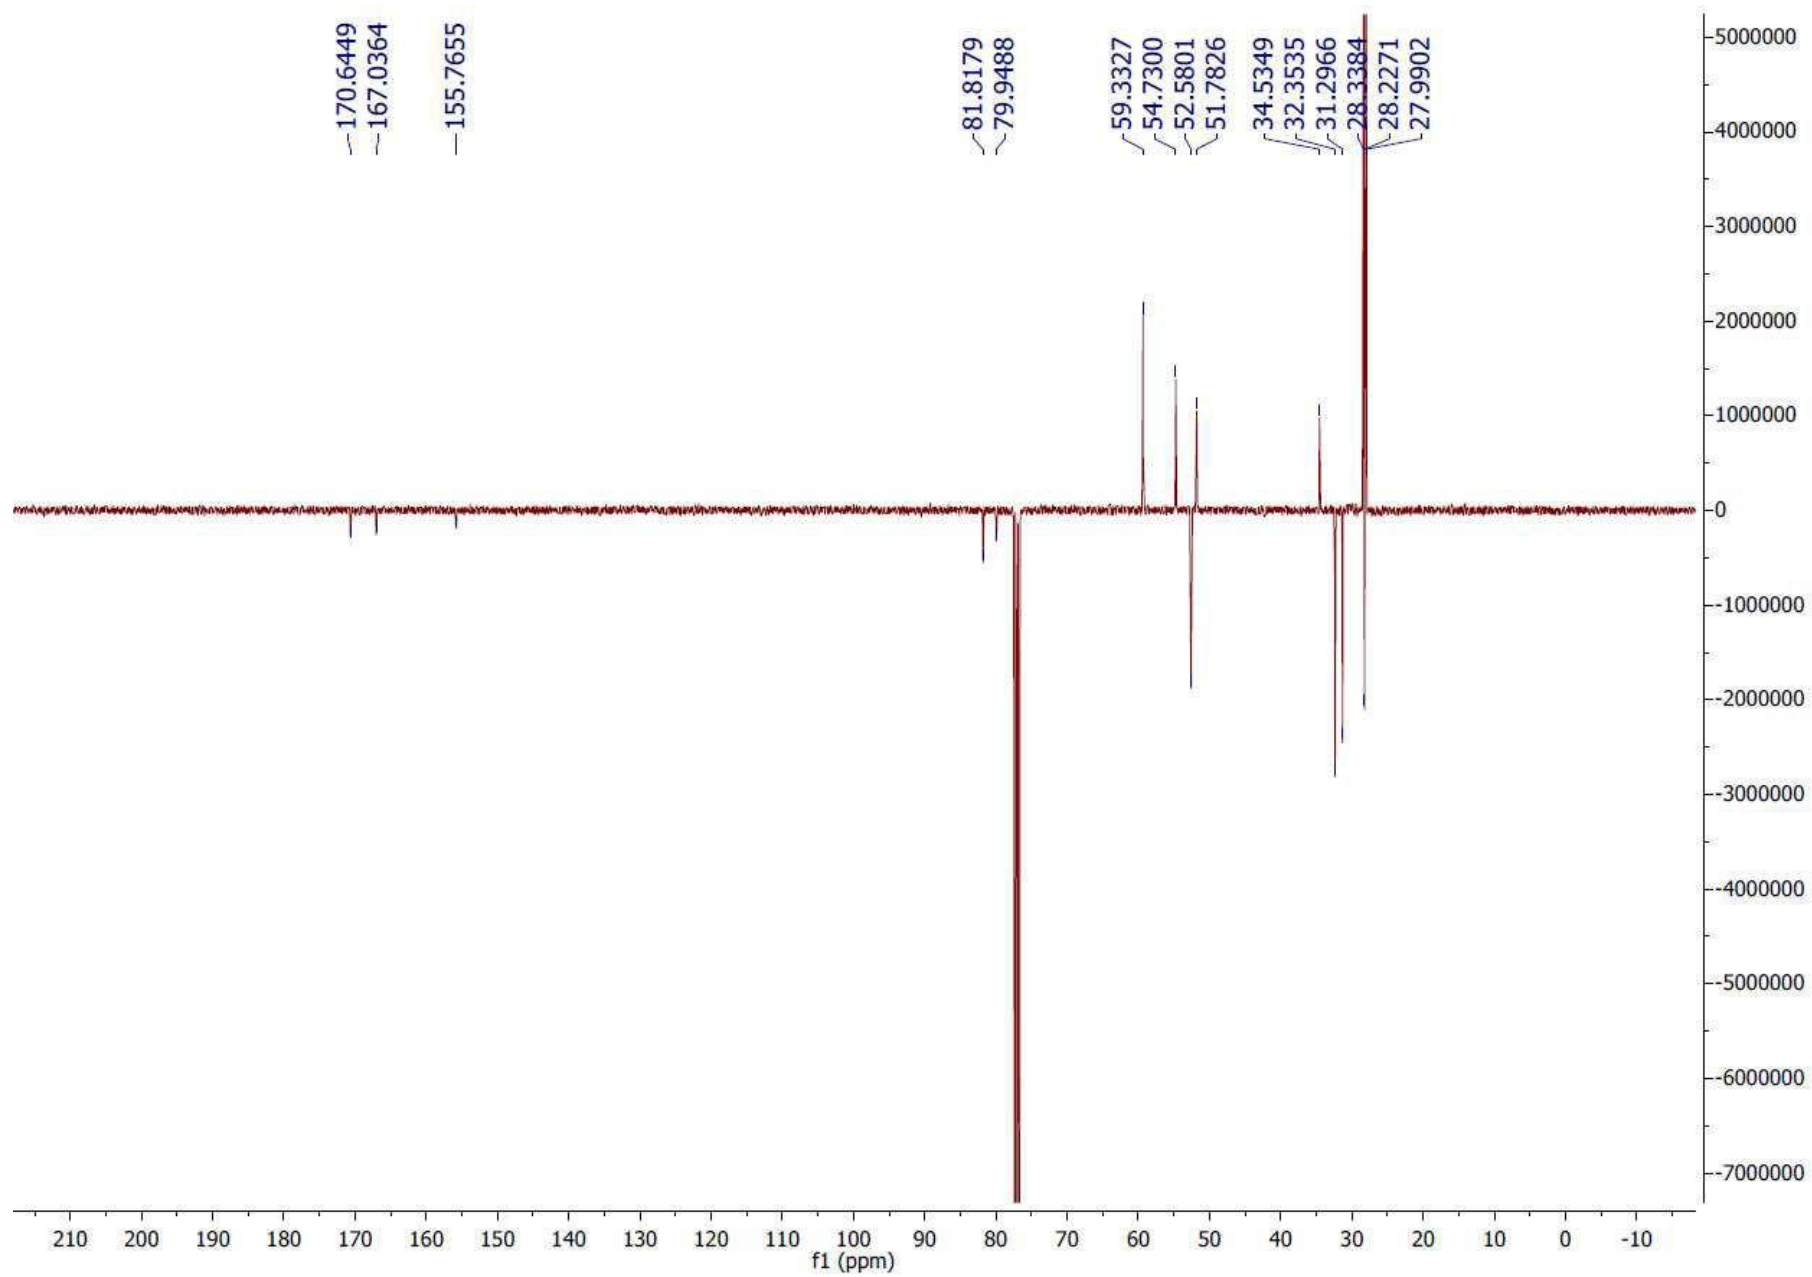

T: FTMS + p ESI Full ms [100.0000-1500.0000]

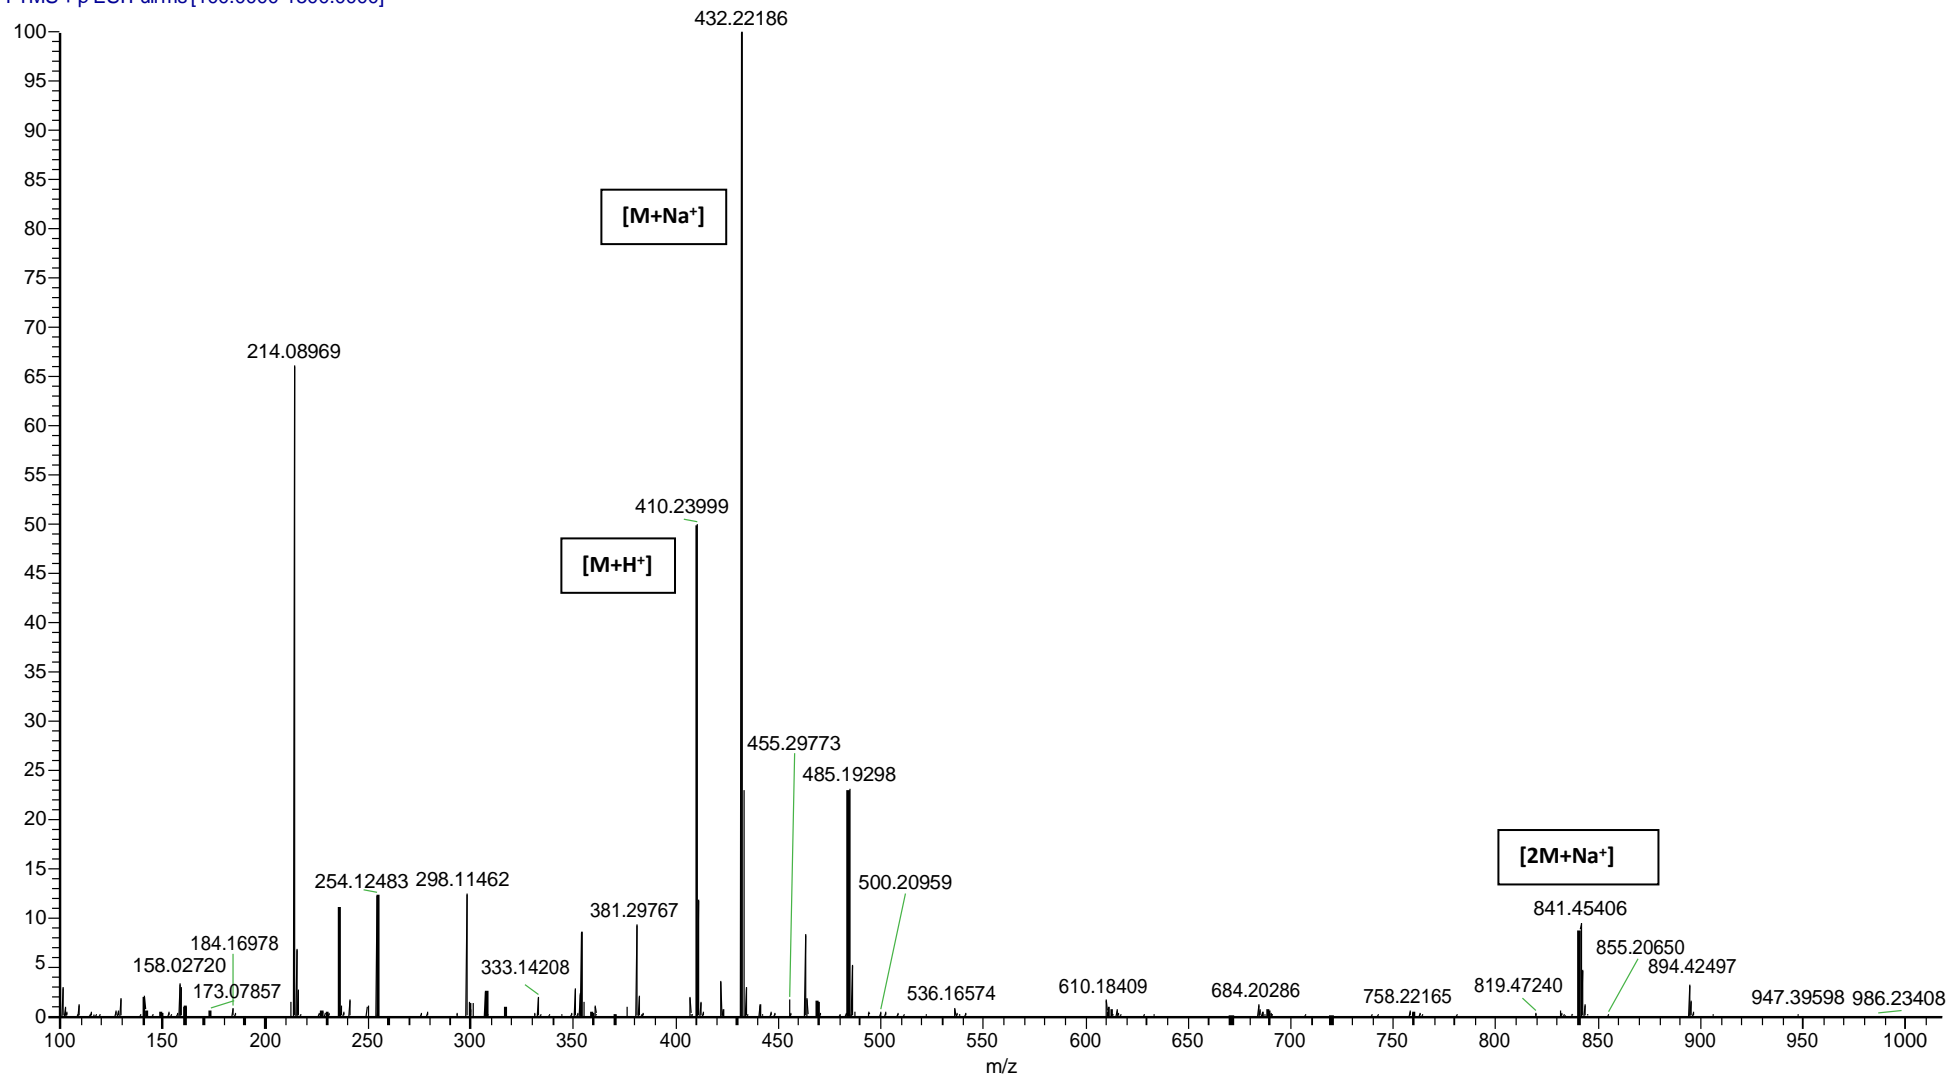

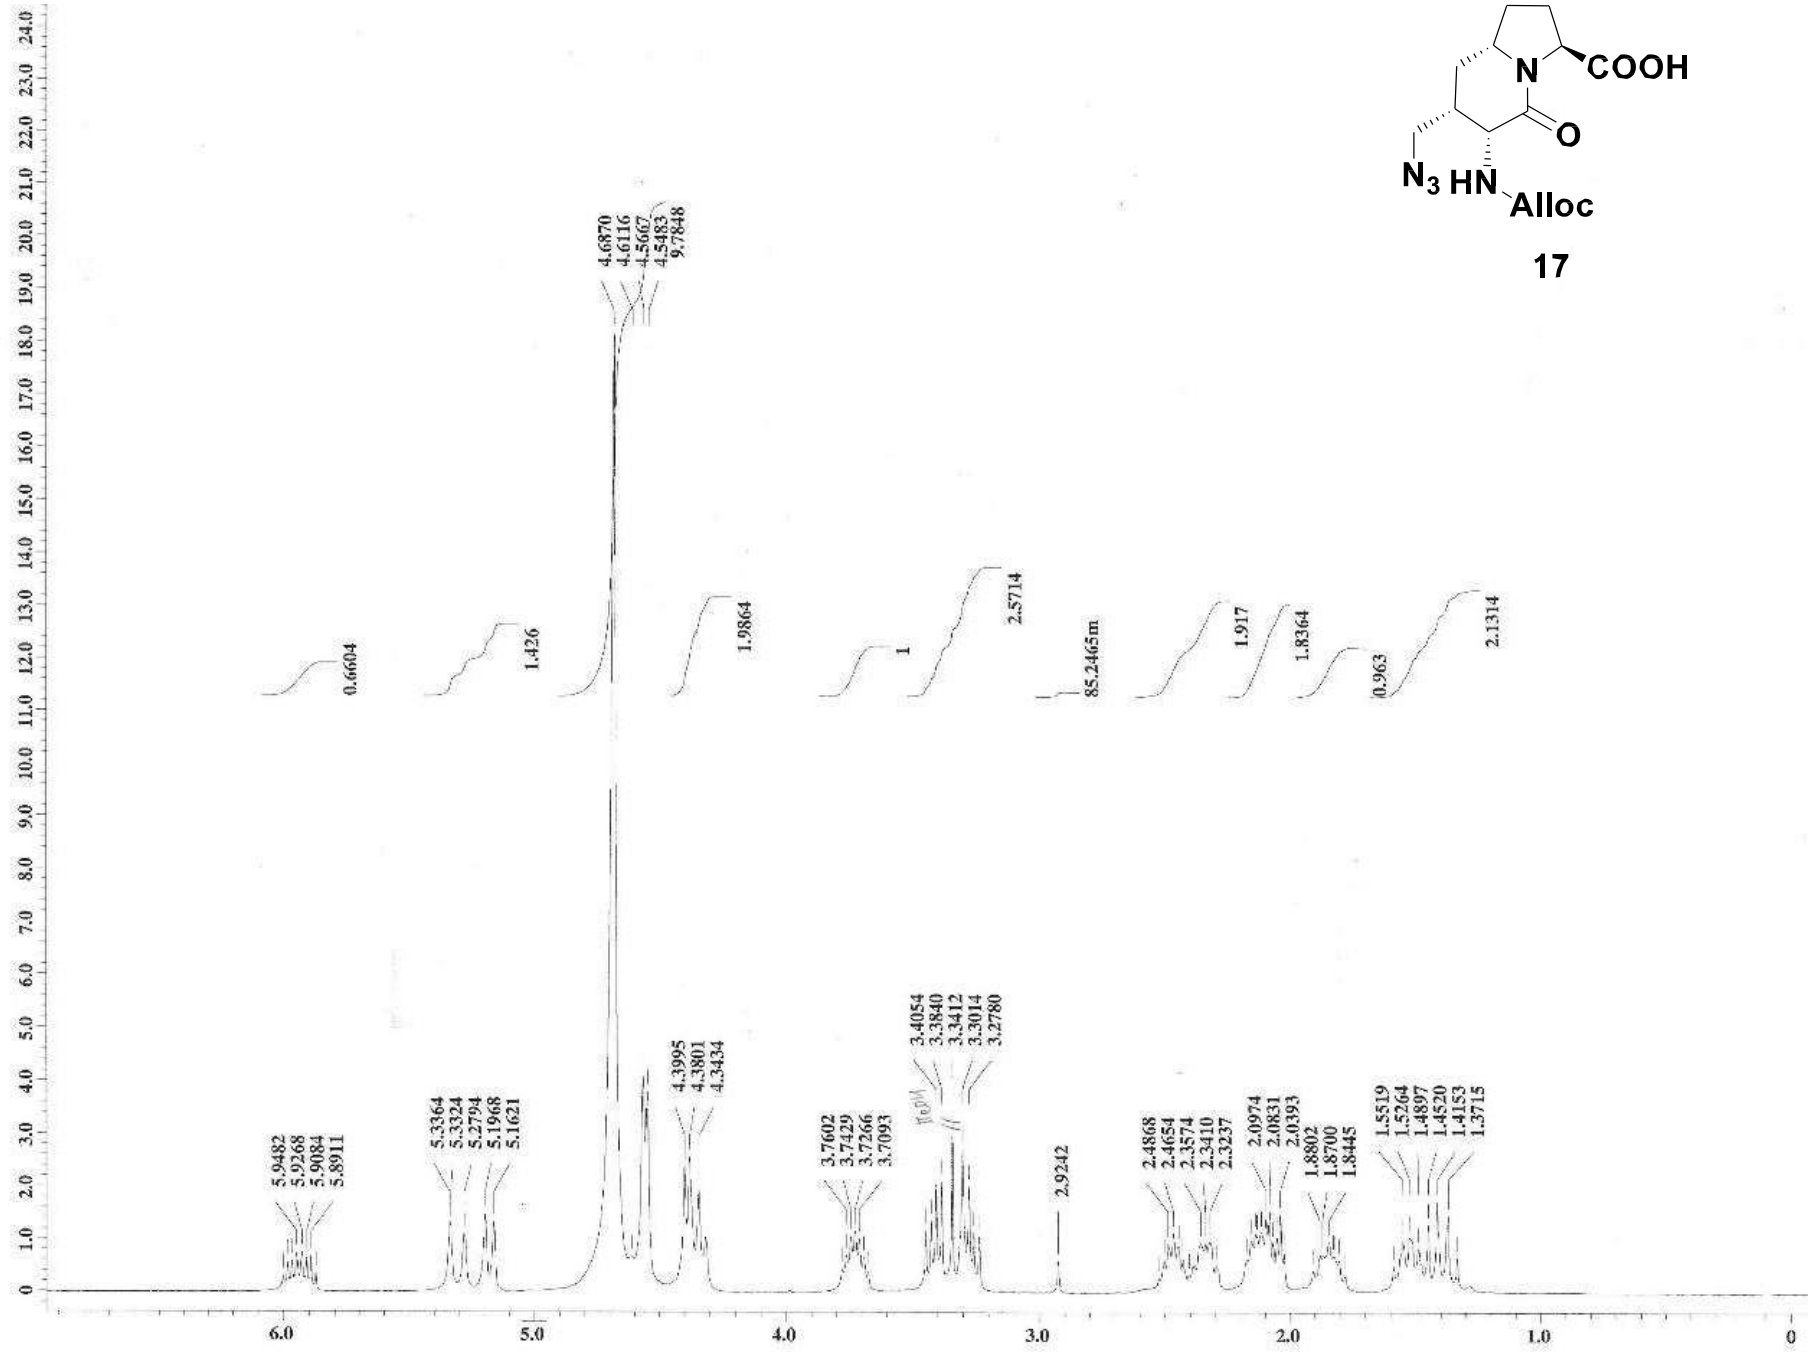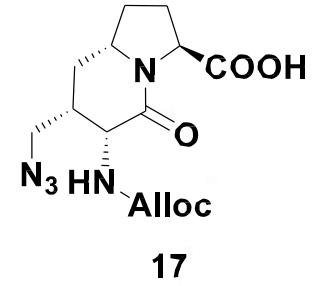

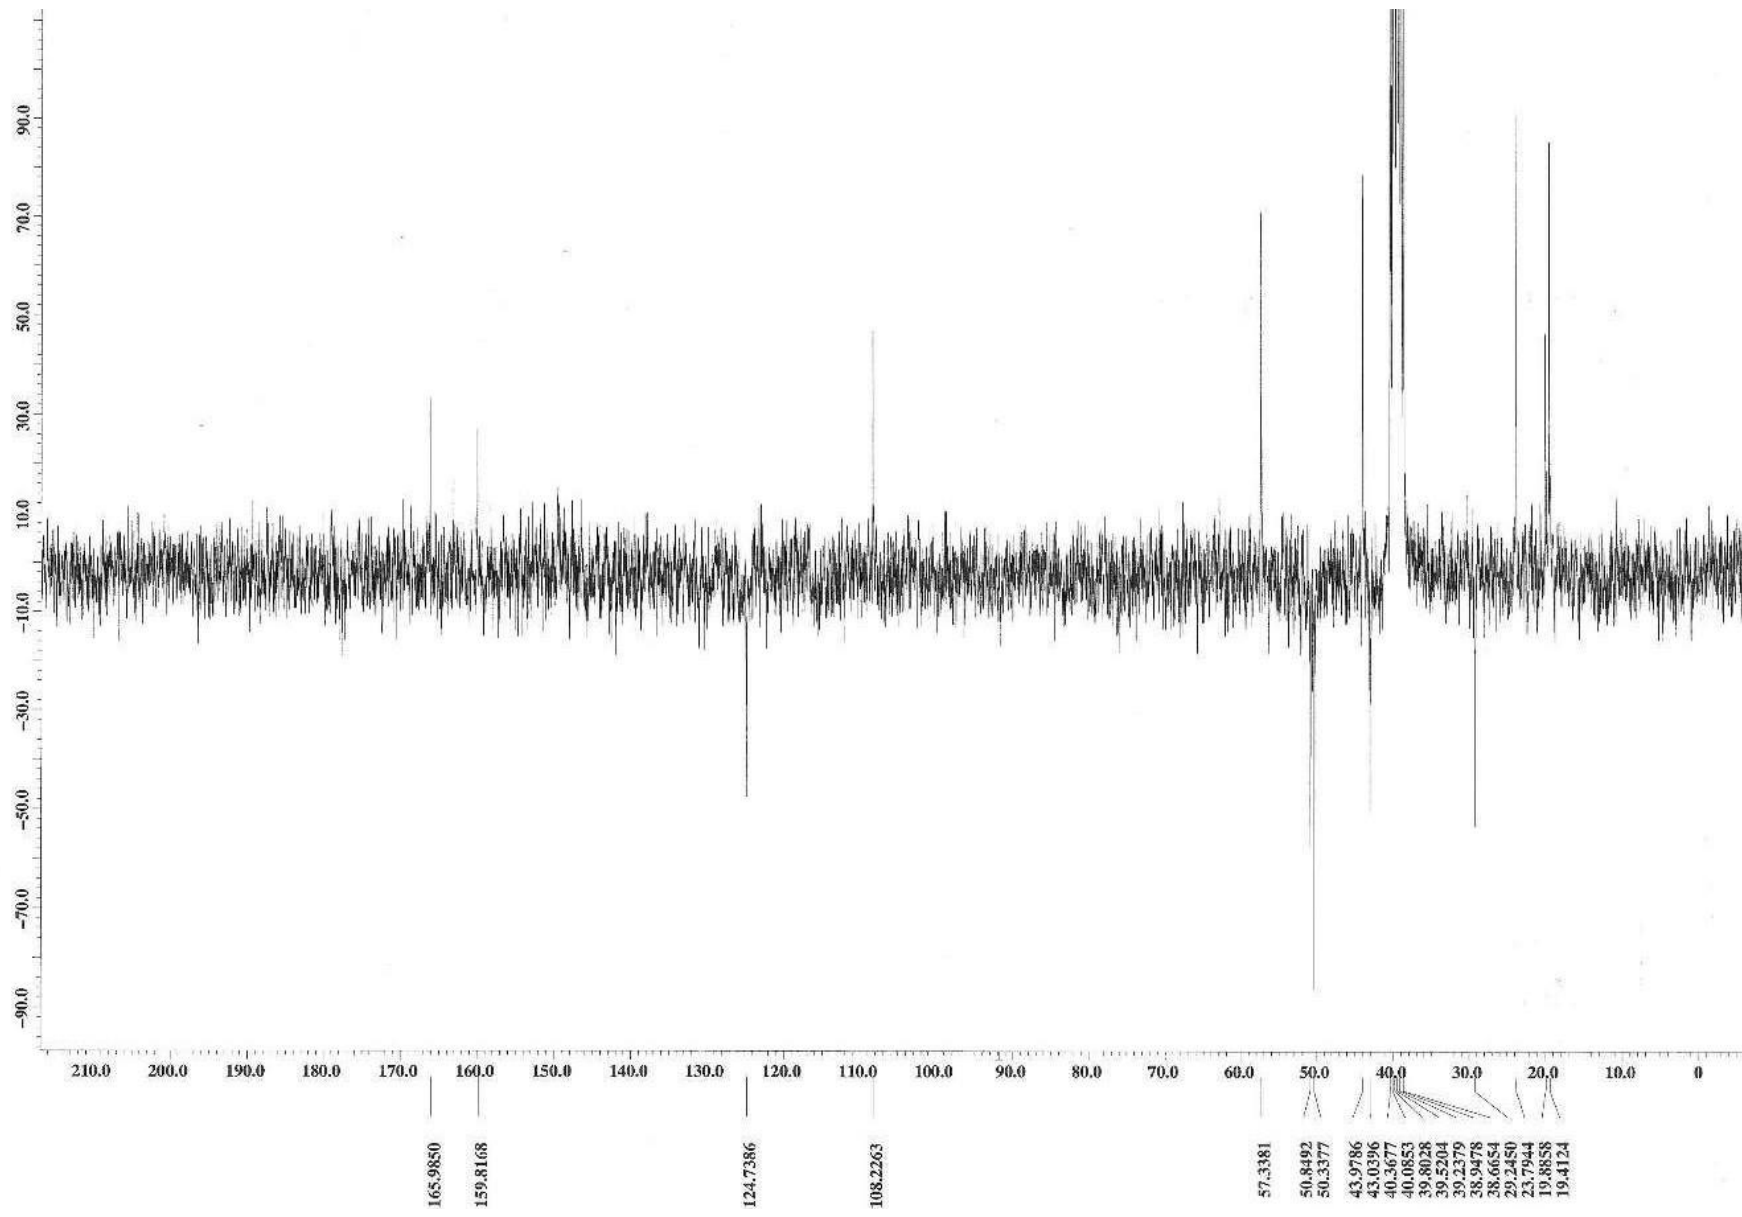

T: FTMS - p ESI Full ms [100.0000 1500.0000]

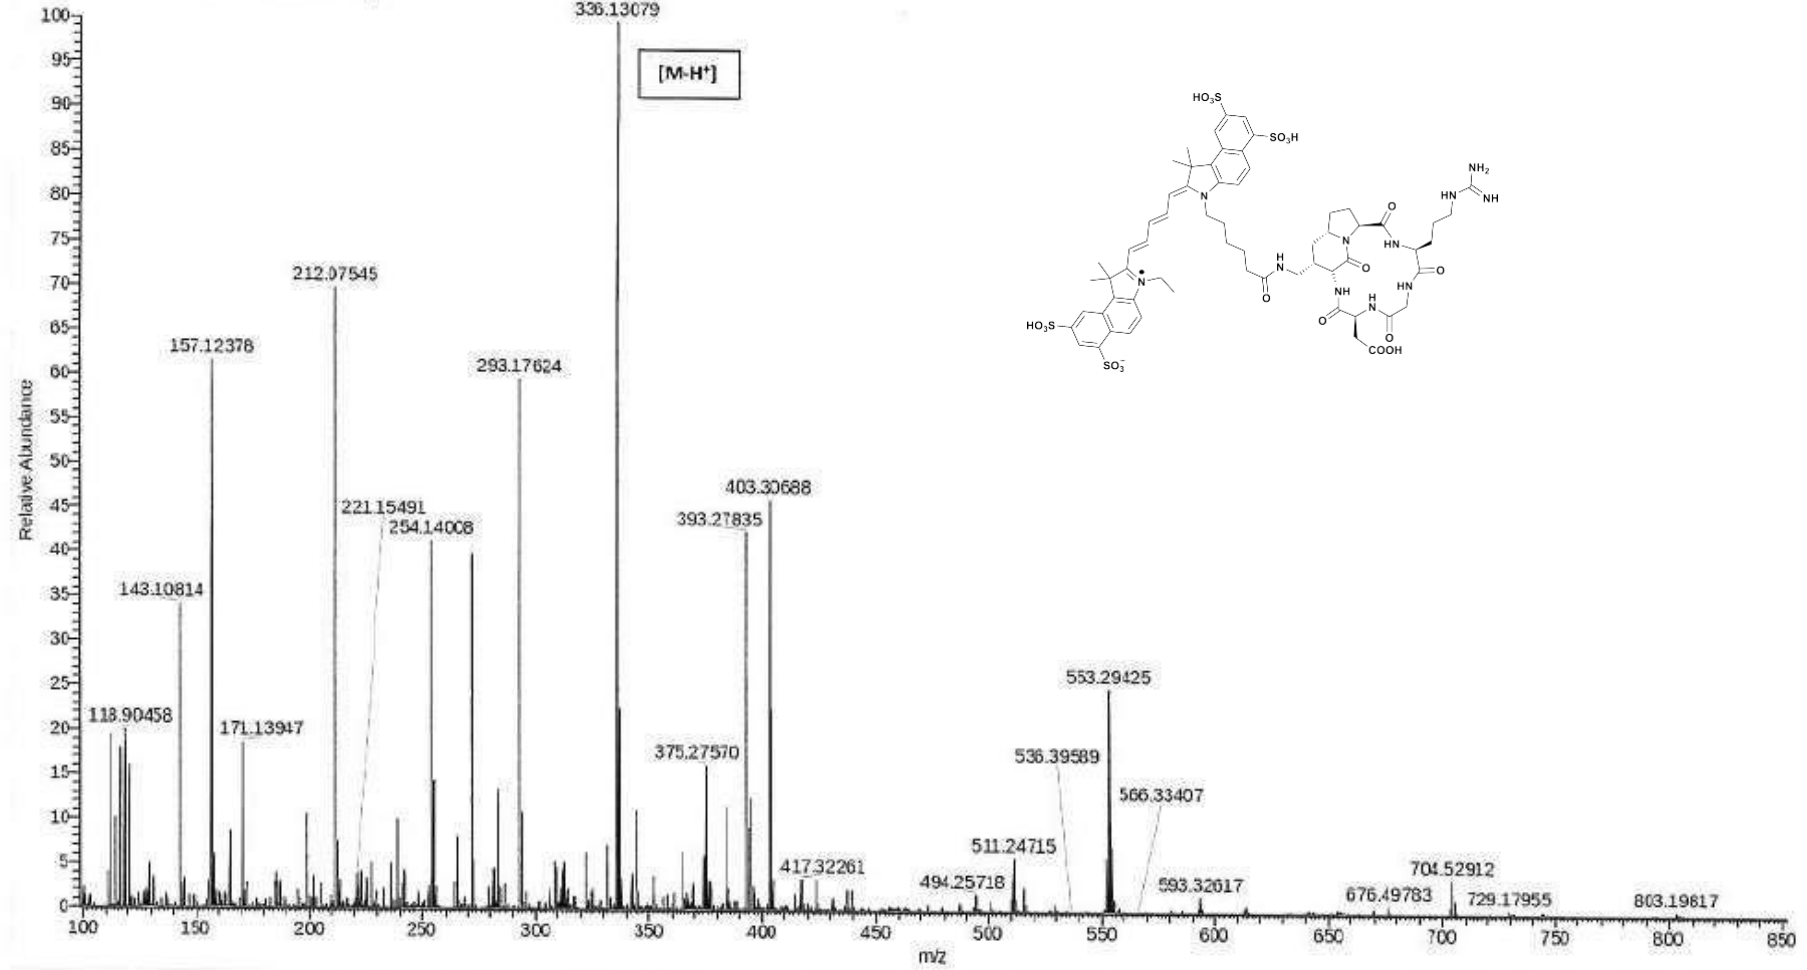

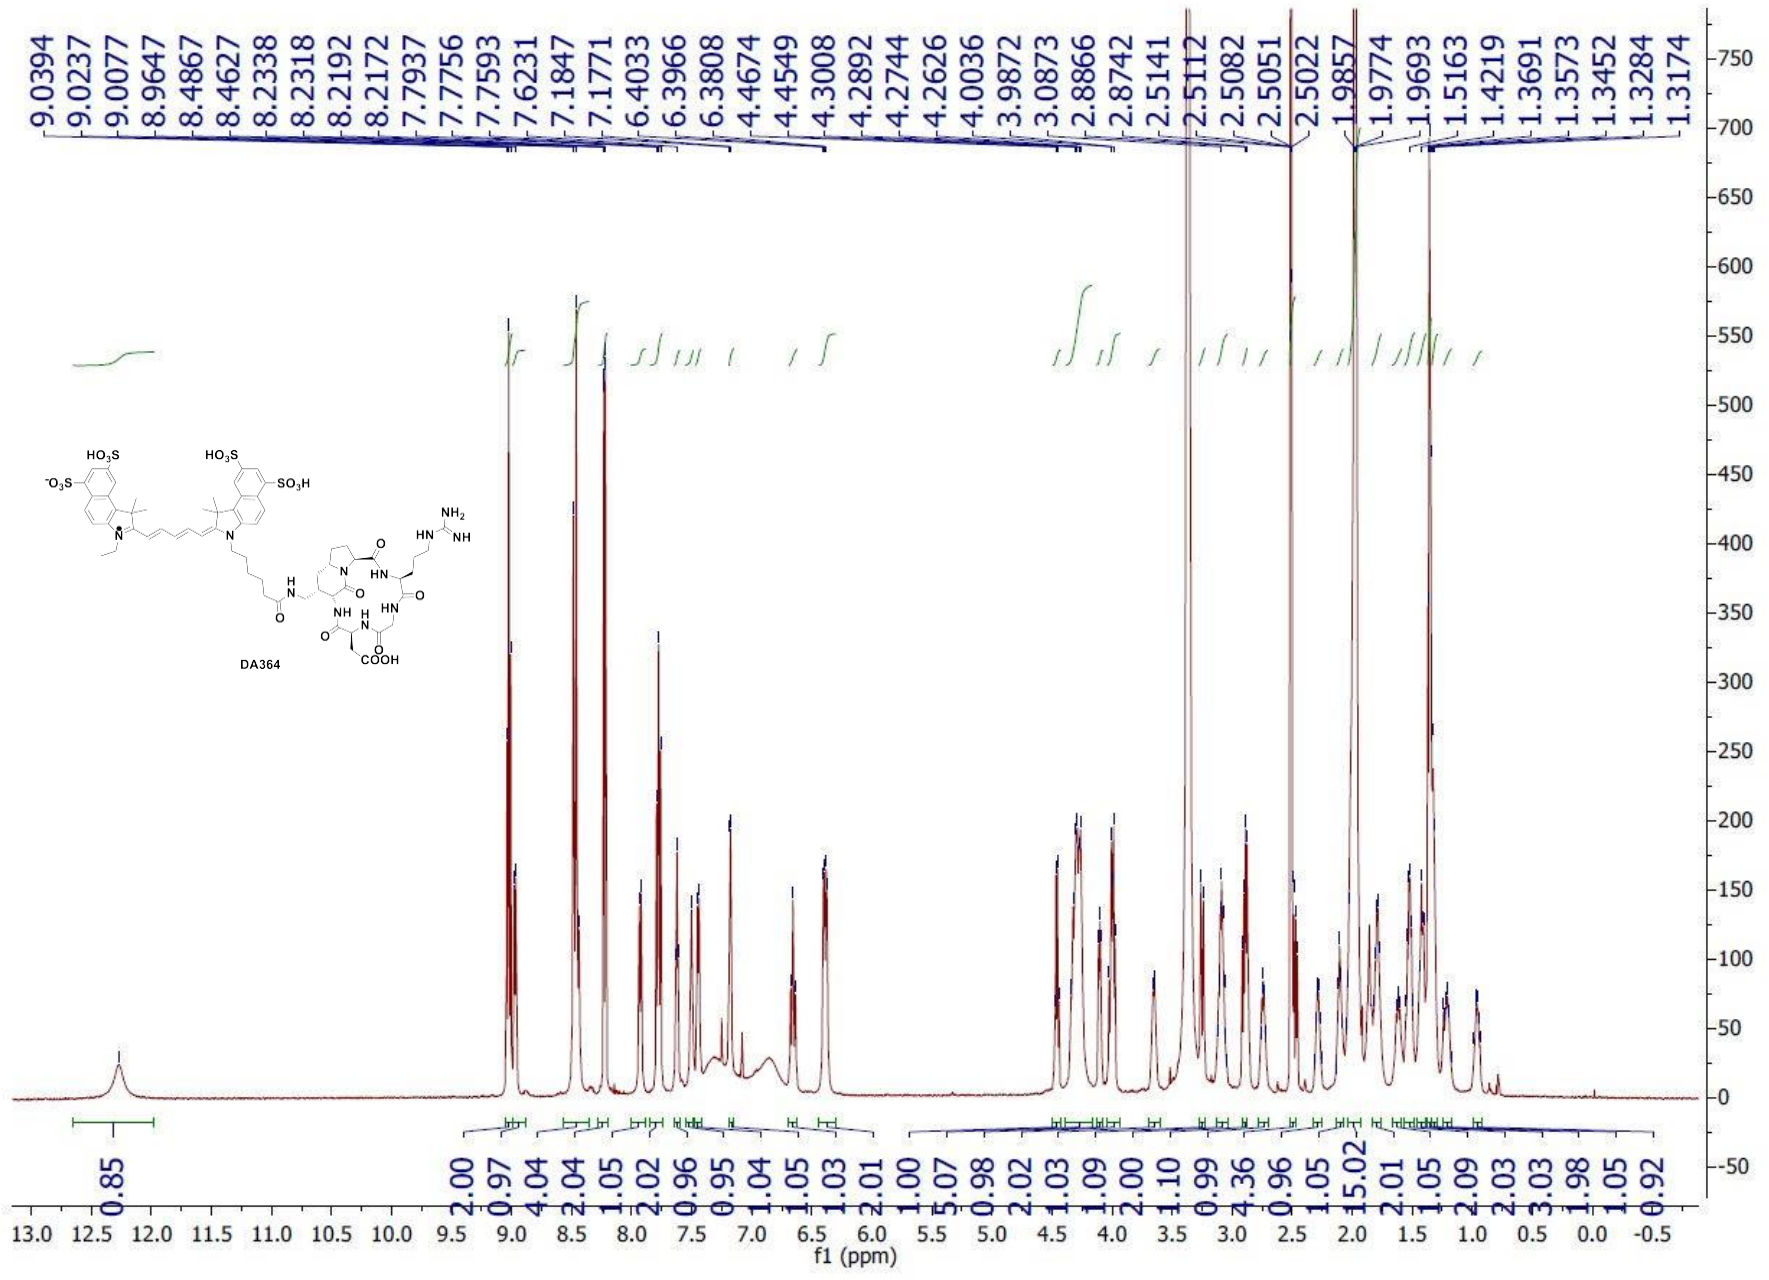

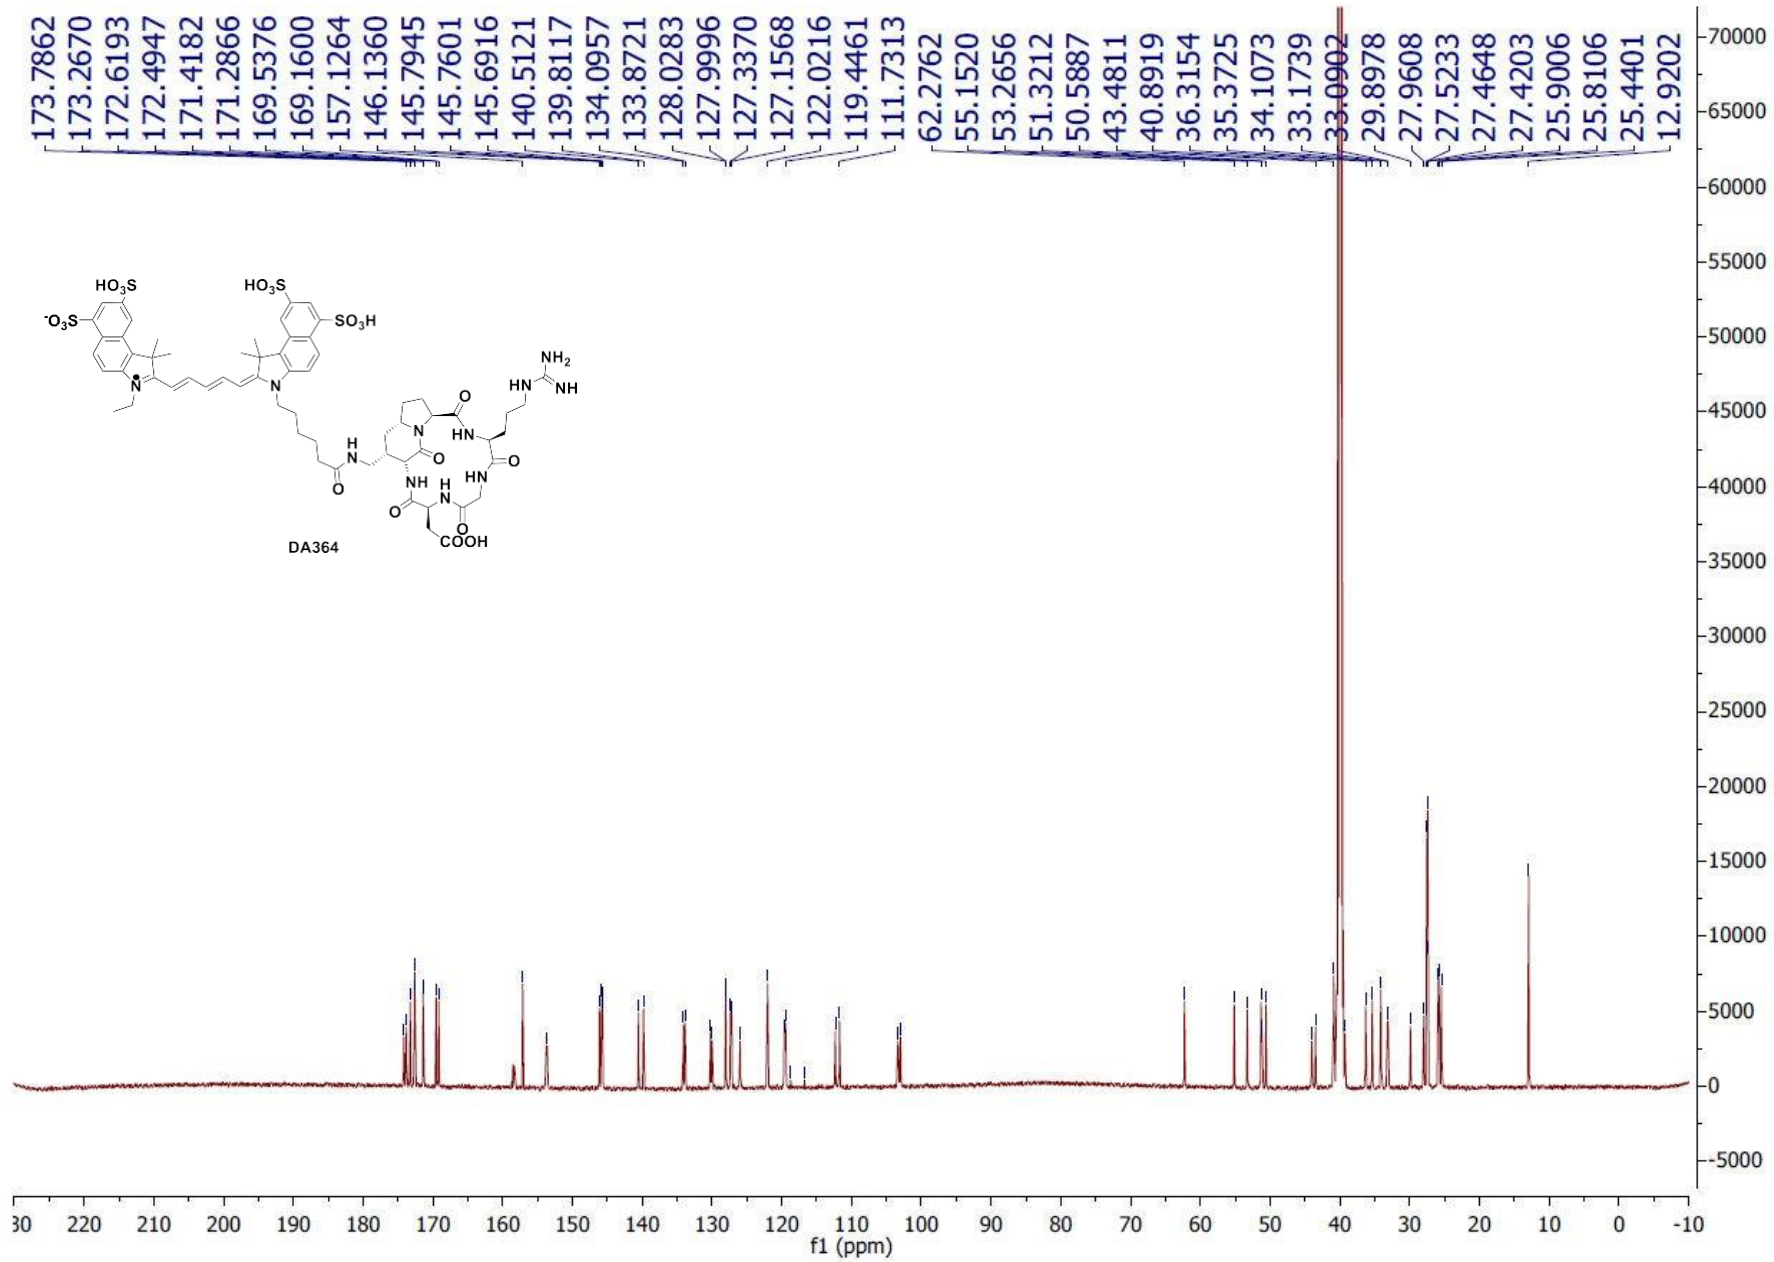



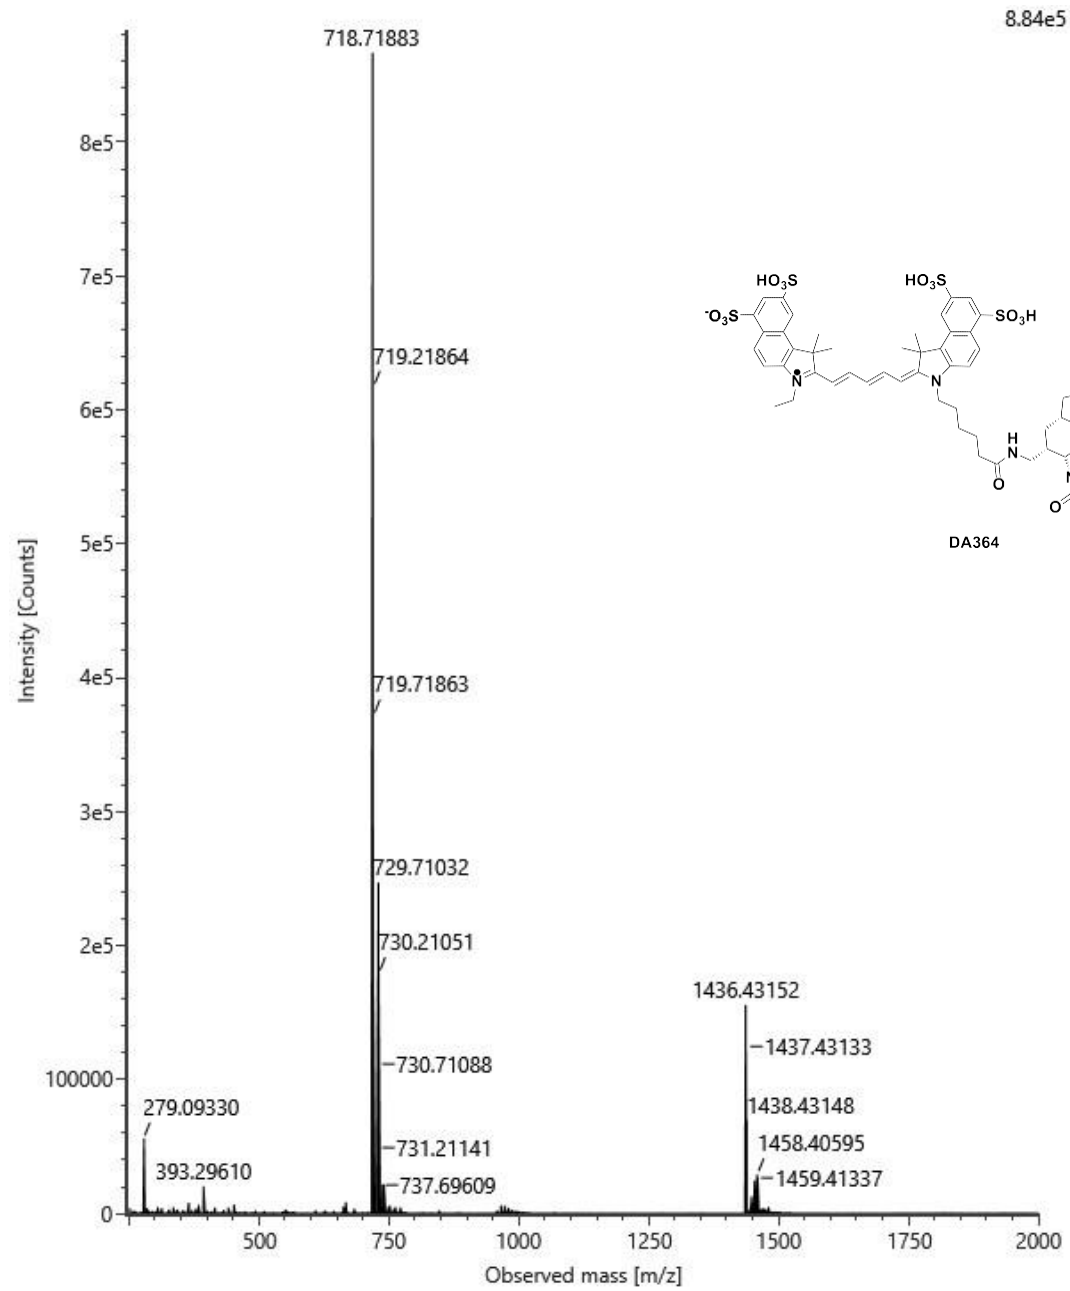

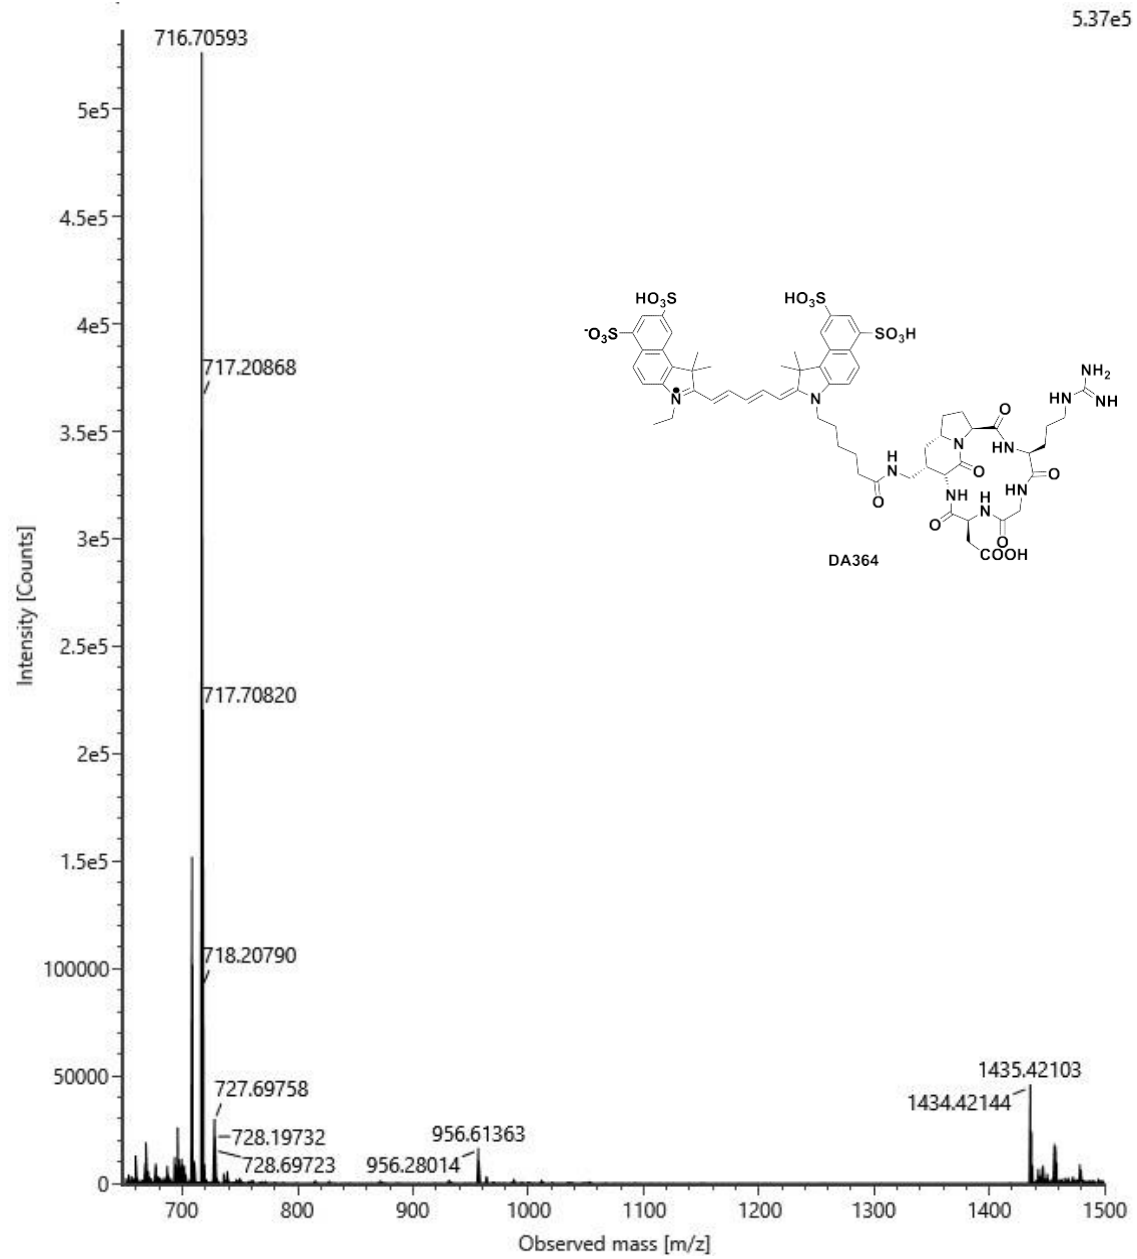

Supplement: d3ob01206a1.pdf [file d3ob01206a1.pdf]
